# Supplementary material
Source: PubMed Central journal article supplement (PMC3187259)
Supplement: supp_79_10_4042__1.pdf [file supp_79_10_4042__1.pdf]

**SUPPLEMENTARY TABLE 1: MIRU-VNTR typing of clinical isolates**

| Patient ID | Spoligotype     | 960,<br>MIRU10 | 1644,<br>MIRU16 | 2059,<br>MIRU20 | 2531,<br>MIRU23 | 2996,<br>MIRU26 | 3192,<br>MIRU31,<br>ETRE | 3690,<br>MTUB39 | 802,<br>MIRU40 | Lineage  |
|------------|-----------------|----------------|-----------------|-----------------|-----------------|-----------------|--------------------------|-----------------|----------------|----------|
| 0210-1193  | 00000000006761  | 3              | 3               | 2               | 5               | 7               | 5                        | 3               | 3              | Beijing  |
| 0310-1477  | 00000000006771  | 3              | 2               | 2               | 5               | 7               | 5                        | 3               | 3              | Beijing  |
| 0202-0294  | 00000000006371  | 3              | 3               | 2               | 5               | 8               | 5                        | 4               | 4              | Beijing  |
| 0307-1070  | 00000000006771  | 2              | 3               | 2               | 5               | 7               | 5                        | 4               | 3              | Beijing  |
| 0309-1399  | 00000000006771  | 3              | 8               | 2               | 5               | 6               | 5                        | 4               | 3              | Beijing  |
| 0408-1497  | 00000000006371  | X              | X               | X               | X               | X               | X                        | X               | X              | Beijing  |
| 0201-0233  | 777737716730771 | 3              | 2               | 1               | 5               | 4               | 3                        | 2               | 3              | Cameroon |
| 0401-0012  | 777737716730771 | X              | X               | X               | X               | X               | X                        | X               | X              | Cameroon |
| 0311-1672  | 777737716730771 | X              | X               | X               | X               | X               | X                        | X               | X              | Cameroon |
| 0201-0221  | 777737716730771 | X              | X               | X               | X               | X               | X                        | X               | X              | Cameroon |
| 0104-0714  | 777737716730771 | X              | X               | X               | X               | X               | X                        | X               | X              | Cameroon |
| 0311-1654  | 777737716730771 | 3              | 2               | 1               | 5               | 4               | 3                        | 2               | 3              | Cameroon |
| 0209-1562  | 775537314730371 | 3              | 3               | 1               | 5               | 5               | 3                        | 2               | 3              | Cameroon |
| 0203-0524  | 175537377146071 | 4              | 3               | 2               | 6               | 2               | 4                        | 3               | 4              | EAI      |
| 0112-1995  | 175535277106371 | 4              | 3               | 2               | 6               | 2               | 5                        | 2               | 3              | EAI      |
| 0302-0187  | 655537377106341 | 4              | 3               | 2               | 6               | 2               | 4                        | 1               | 3              | EAI      |
| 0302-0341  | 777737340006671 | 4              | 3               | 2               | 6               | 2               | 5                        | 3               | 3              | EAI      |
| 0303-0485  | 77773777730301  | 4              | 2               | 2               | 5               | 2               | 5                        | 2               | 3              | EAI      |
| 0403-0498  | 700735717146771 | 4              | 2               | 2               | 6               | 2               | 5                        | 3               | 3              | EAI      |
| 0212-1868  | 775537307730371 | 3              | 3               | 2               | 5               | 4               | 3                        | 2               | 7              | Ghana    |
| 0307-1036  | 775537377730371 | 3              | 3               | 2               | 5               | 4               | 3                        | 2               | 6              | Ghana    |
| 0404-0546  | 77573777730771  | 3              | 3               | 2               | 5               | 4               | 3                        | 3               | 5              | Ghana    |
| 0212-1935  | 775537377730371 | 3              | 4               | 2               | 5               | 5               | 3                        | 2               | 3              | Haarlem  |
| 0208-1341  | 775537367720371 | 5              | 3               | 1               | 2               | 5               | 3                        | 2               | 3              | Haarlem  |
| 0210-1669  | 775537377730371 | 3              | 4               | 2               | 5               | 5               | 3                        | 2               | 2              | Haarlem  |
| 0207-1099  | 77773777720771  | X              | X               | 2               | 3               | 3               | X                        | X               | X              | Haarlem  |
| 0202-0443  | 675535377720361 | 5              | 3               | 1               | 3               | 5               | X                        | X               | X              | Haarlem? |
| 0303-0294  | 775537377720371 | 5              | 3               | 2               | 3               | 5               | 3                        | 2               | 3              | Haarlem  |
| 0112-2032  | 775537377720371 | 5              | 3               | 2               | 4               | 5               | 3                        | 2               | 3              | Haarlem  |
| 0302-0173  | 777537377730371 | 2              | 3               | 2               | 5               | 4               | 2                        | 2               | 2              | Haarlem  |
| 0301-0144  | 777737377730771 | 3              | 4               | 2               | 5               | 5               | 3                        | 2               | 2              | Haarlem  |
| 0304-0546  | 000000001020771 | 5              | 3               | 1               | 3               | 5               | 3                        | 2               | 3              | Haarlem  |
| 0304-0547  | 77773777720761  | 5              | 3               | 1               | 3               | 5               | 3                        | 2               | 3              | Haarlem  |

| Patient ID | Spoligotype     | 960,<br>MIRU10 | 1644,<br>MIRU16 | 2059,<br>MIRU20 | 2531,<br>MIRU23 | 2996,<br>MIRU26 | 3192,<br>MIRU31,<br>ETRE | 3690,<br>MTUB39 | 802,<br>MIRU40 | Lineage      |
|------------|-----------------|----------------|-----------------|-----------------|-----------------|-----------------|--------------------------|-----------------|----------------|--------------|
| 0305-0616  | 77773777730771  | 3              | 1               | 2               | 5               | 5               | 4                        | 2               | 6              | Haarlem      |
| 0306-0842  | 775737771020711 | 5              | 3               | 2               | 3               | 5               | 3                        | 2               | 3              | Haarlem      |
| 0305-0816  | 77773777720771  | 5              | 3               | 2               | 5               | 5               | 3                        | 2               | 4              | Haarlem      |
| 0307-1133  | 777737371720771 | 5              | 3               | 2               | 3               | 5               | 2                        | 2               | 3              | Haarlem      |
| 0210-1655  | 777737771020771 | 4              | 3               | 2               | 3               | 5               | 3                        | 2               | 3              | Haarlem      |
| 0406-1023  | 775537716730371 | 5              | 0               | 2               | X               | X               | 3                        | 2               | 3              | Haarlem?     |
| 0208-1361  | 177735671020771 | 5              | 3               | 2               | 5               | 5               | 3                        | 2               | 3              | Haarlem      |
| 0203-0538  | 775537377730761 | 3              | 1               | 2               | 5               | 4               | 3                        | 1               | 4              | Haarlem like |
| 0206-0934  | 775537377720371 | 5              | 3               | 1               | 3               | 5               | 3                        | 2               | 3              | Haarlem like |
| 0207-1146  | 575537371020771 | 5              | 3               | 2               | 3               | 5               | 3                        | 2               | 2              | Haarlem like |
| 0305-0778  | 77773777730761  | 3              | 4               | 2               | 5               | 5               | 3                        | 2               | 2              | Haarlem like |
| 0306-0916  | 777737771020751 | 4              | 3               | 2               | 3               | 5               | 3                        | 2               | 3              | Haarlem like |
| 0206-0929  | 775527331020371 | 4              | 3               | 2               | 7               | 5               | 2                        | 2               | 4              | LAM          |
| 0207-1206  | 375537307730371 | 3              | 1               | 2               | 6               | 5               | 3                        | 2               | 2              | LAM          |
| 0206-0946  | 775527331020371 | 4              | 3               | 2               | 5               | 5               | 2                        | 2               | 4              | LAM          |
| 0211-1795  | 771437307730371 | 4              | 3               | 2               | 6               | 5               | 3                        | 2               | 3              | LAM          |
| 0207-1188  | 775527307530361 | 3              | 3               | 2               | 6               | 5               | 2                        | 2               | 4              | LAM          |
| 0212-2007  | 777727307730731 | 4              | 3               | 2               | 4               | 6               | 3                        | 2               | 4              | LAM          |
| 0211-1956  | 375537307730371 | 3              | 2               | 2               | 6               | 5               | 3                        | 2               | 1              | LAM          |
| 0303-0372  | 777737767730771 | 3              | 3               | 2               | 6               | 5               | 3                        | 2               | 3              | LAM          |
| 0303-0466  | 777727307730731 | 4              | 3               | 2               | 4               | 6               | 3                        | 2               | 4              | LAM          |
| 0307-1117  | 777706777730771 | 4              | 3               | 2               | 5               | 4               | 2                        | 2               | 3              | LAM          |
| 0308-1283  | 77773777730771  | 4              | 3               | 2               | 5               | 5               | 2                        | 2               | 3              | LAM          |
| 0308-1195  | 777737203030771 | 4              | 1               | 2               | 6               | 5               | 3                        | 2               | 1              | LAM          |
| 0309-1292  | 777737377730771 | 3              | 2               | 2               | 6               | 5               | 3                        | 2               | 1              | LAM          |
| 0404-0632  | not done        | X              | X               | 3               | 6               | 5               | 3                        | 2               | 3              | LAM          |
| 0112-2023  | 775537377730371 | 4              | 3               | 2               | 5               | 5               | 4                        | 2               | 5              | X            |
| 0302-0231  | 37373677777300  | 2              | 3               | 2               | 4               | 5               | 3                        | 2               | 2              | M. bovis ?   |
| 0212-1859  | 670537306047371 | 2              | 3               | 2               | 4               | 4               | 5                        | 2               | 2              | ok           |
| 0210-1620  | 775527304530351 | 5              | 2               | 2               | 6               | 5               | 2                        | 2               | 3              | Unknown      |
| 0211-1770  | 775537377730771 | X              | X               | X               | X               | X               | X                        | X               | X              | Unknown      |
| 0204-0600  | 145437377730361 | 5              | 2               | 2               | 5               | 3               | 3                        | 2               | 3              | Unknown      |
| 0206-0945  | 675535377730371 | 3              | 3               | 2               | 6               | 4               | 3                        | 2               | 3              | Unknown      |
| 0204-0739  | 775537377730371 | 5              | 4               | 2               | 5               | 5               | X                        | 2               | 2              | Unknown      |

| Patient ID | Spoligotype     | 960,<br>MIRU10 | 1644,<br>MIRU16 | 2059,<br>MIRU20 | 2531,<br>MIRU23 | 2996,<br>MIRU26 | 3192,<br>MIRU31,<br>ETRE | 3690,<br>MTUB39 | 802,<br>MIRU40 | Lineage |
|------------|-----------------|----------------|-----------------|-----------------|-----------------|-----------------|--------------------------|-----------------|----------------|---------|
| 0112-2137  | 675537307730331 | 5              | 3               | 2               | 3               | 6               | 3                        | 2               | 2              | Unknown |
| 0204-0691  | 777737303030771 | 5              | 1               | 2               | 6               | 4               | 3                        | 2               | 1              | Unknown |
| 0206-1060  | 775527307530761 | 3              | 3               | 2               | 6               | 5               | 2                        | 2               | 5              | Unknown |
| 0103-1423  | 775537300000000 | 6              | 3               | 2               | 6               | 5               | 2                        | 2               | 8              | Unknown |
| 0307-1098  | 775537307730371 | 4              | 3               | 2               | 6               | 7               | 4                        | 2               | 2              | Unknown |
| 0309-1324  | 777737307730771 | 4              | 3               | 2               | 6               | 6               | 3                        | 2               | 7              | Unknown |
| 0309-1352  | 177737307730771 | 4              | 2               | 2               | 4               | 7               | 3                        | 2               | 1              | Unknown |
| 0309-1320  | 773437307730771 | 4              | 2               | 2               | 6               | 2               | 3                        | 2               | 3              | Unknown |
| 0210-1638  | 777737307730771 | X              | X               | 2               | 4               | 5               | 3                        | X               | 3              | Unknown |
| 0312-1880  | 704737207730771 | X              | X               | X               | X               | X               | X                        | X               | X              | Unknown |
| 0401-0143  | not done        | X              | X               | X               | X               | X               | X                        | X               | X              | Unknown |
| 0402-0244  | 77773777720771  | 5              | 3               | 2               | 5               | 5               | 4                        | 2               | 4              | Unknown |
| 0403-0358  | 77773777730771  | 3              | 3               | 2               | 5               | 5               | 2                        | 2               | 1              | Unknown |
| 0401-0021  | not done        | X              | X               | X               | X               | X               | X                        | X               | X              | Unknown |
| 0404-0508  | 736737710006771 | 5              | 4               | 3               | 5               | 8               | 5                        | 3               | 3              | Unknown |
| 0404-0535  | 775535377720371 | X              | X               | X               | X               | X               | X                        | X               | X              | Unknown |
| 0406-0998  | 77732777730771  | X              | X               | X               | X               | X               | X                        | X               | X              | Unknown |
| 0404-0693  | 77553777730301  | X              | X               | X               | X               | X               | X                        | X               | X              | Unknown |
| 0407-1218  | 771007307730371 | X              | X               | X               | X               | X               | X                        | X               | X              | Unknown |
| 0407-1254  | 77773777720761  | X              | X               | X               | X               | X               | X                        | X               | X              | Unknown |
| 0405-0821  | 77773777730761  | 3              | 3               | 2               | 5               | 5               | 4                        | 2               | 3              | Unknown |
| 0407-1329  | 777737771020771 | X              | X               | X               | X               | X               | X                        | X               | X              | Unknown |
| 0408-1412  | 77773777720771  | X              | X               | X               | X               | X               | X                        | X               | X              | Unknown |
| 0408-1436  | 777737305730371 | X              | X               | X               | X               | X               | X                        | X               | X              | Unknown |
| 0407-1150  | 777737773000071 | X              | X               | X               | X               | X               | X                        | X               | X              | Unknown |
| 0407-1232  | 754735307730771 | X              | X               | X               | X               | X               | X                        | X               | X              | Unknown |
| 0409-1564  | not done        | X              | X               | X               | X               | X               | X                        | X               | X              | Unknown |
| 0405-0798  | not done        | X              | X               | X               | X               | X               | X                        | X               | X              | Unknown |
| 0407-1133  | 777737773000061 | X              | X               | X               | X               | X               | X                        | X               | X              | Unknown |
| 0407-1223  | 777737770000000 | X              | X               | X               | X               | X               | X                        | X               | X              | Unknown |
| 3503 SL    | 777737716730771 | X              | X               | X               | X               | X               | X                        | X               | X              | Unknown |
| non enreg  | 77773777720771  | X              | X               | X               | X               | X               | X                        | X               | X              | Unknown |
| 0308-1262  | 770000006730771 | 3              | 3               | 2               | 6               | 5               | 3                        | 2               | 5              | S       |
| 0404-0705  | 773637377730771 | 3              | 3               | 3               | 5               | 5               | 3                        | 2               | 4              | S       |

| Patient ID | Spoligotype     | 960,<br>MIRU10 | 1644,<br>MIRU16 | 2059,<br>MIRU20 | 2531,<br>MIRU23 | 2996,<br>MIRU26 | 3192,<br>MIRU31,<br>ETRE | 3690,<br>MTUB39 | 802,<br>MIRU40 | Lineage        |
|------------|-----------------|----------------|-----------------|-----------------|-----------------|-----------------|--------------------------|-----------------|----------------|----------------|
| 0303-0394  | 777737101730771 | 5              | 1               | 2               | 5               | 1               | 3                        | 2               | 2              | TUR            |
| 0308-1255  | 77773777700771  | 3              | 3               | 2               | 5               | 5               | 4                        | 2               | 2              | Uganda         |
| 0305-0701  | 771027300730700 | 3              | 2               | 2               | 2               | 4               | 4                        | 2               | 3              | Uganda I       |
| 0404-0604  | 73773777730771  | 3              | 3               | 3               | 5               | 4               | 3                        | 2               | 3              | Uganda II      |
| 0212-1925  | 771427377730751 | 3              | 3               | 2               | 5               | 5               | 2                        | 2               | 2              | Uganda or S    |
| 0304-0651  | 770436306306311 | 4              | 4               | 2               | 4               | 4               | 5                        | 2               | 2              | West African   |
| 0402-0195  | 77073770777371  | 4              | 4               | 2               | 4               | 4               | 5                        | 2               | 2              | West African 2 |
|            | 77777477760771  | 3              | 2               | 2               | 6               | 3               | 3                        | 2               | 1              | H37Rv          |

**SUPPLEMENTARY TABLE 2: List of primers used for PCR and sequencing of *esx* genes**

| <b>2A Primers used for PCR</b> |                       |          |               |                     | <b>2B Internal primers used for sequencing</b> |                      |          |
|--------------------------------|-----------------------|----------|---------------|---------------------|------------------------------------------------|----------------------|----------|
|                                | 5' → 3'               | position | fragment size | T <sub>m</sub> (°C) |                                                | 5' → 3'              | position |
| esxA                           | CACGCCGCTGATGTCTCA    | 4351950  | 1248          | 53                  | esxS1                                          | ACCCGGGCCGGAAGACTT   | 4352212  |
| esxB                           | CGACACGAACCGCTCCGA    | 4353198  |               | 55                  | esxS2                                          | AACACGAGAAAGGGCGAG   | 4352961  |
| esxC                           | ACGGTCAGCCATTCACGGAC  | 4373419  | 1271          | 56                  | esxS3                                          | TCGTCAGCATGTACAG     | 4373621  |
| esxD                           | CTTTCGAATCGGGCACCAGC  | 4374689  |               | 56                  | esxS4                                          | TCGACAGGTCCGCAGA     | 4374460  |
| esxE                           | GCCCAGCGACATCCGACATC  | 4390135  | 1211          | 58                  | esxS5                                          | ACCCGCAGCCACCACC     | 4390367  |
| esxF                           | GGACAACCTGCGCTGGTATGG | 4391345  |               | 56                  | esxS6                                          | CCCGGGCGGCTGAATT     | 4391080  |
| esxG                           | TTTCGGCCCCTCGACGGG    | 351221   | 1244          | 57                  | esxS7                                          | CGACAGCAAGTAACCG     | 351464   |
| esxH                           | CGACGATGCCACGTAGCA    | 352464   |               | 53                  | esxS8                                          | GAACCAAGCGTTGTCG     | 352199   |
| esxI                           | CCAACAATGCGTCCACCC    | 1160256  | 1203          | 53                  | esxS9                                          | TGGCCACACACCAACC     | 1160482  |
| esxJ                           | CACAGCGCTCGAAGGCAG    | 1161459  |               | 55                  | esxS10                                         | ACCACCGCGCCGATCA     | 1161219  |
| esxK                           | CAACCAGGCAGTCACCCC    | 1340329  | 1272          | 55                  | esxS11                                         | GTGCATGACAAGTTACAGG  | 1340606  |
| esxL                           | CAACAACCCCCAGGAACG    | 1341601  |               | 53                  | esxS12                                         | CCCGAAGGATCACGCG     | 1341350  |
| esxM                           | CACGACAATGAACGCCAG    | 2029969  | 1364          | 53                  | esxS13                                         | TCGGCGTCCATAACAG     | 2030292  |
| esxN                           | ACAGCAGGGCGACGACTT    | 2031333  |               | 53                  | esxS14                                         | AACTGCAGGACACAGC     | 2031038  |
| esxO                           | CCTACGCTAACGCGGCAT    | 2625541  | 1334          | 53                  | esxS15                                         | GGGGATACCCGTACGC     | 2625821  |
| esxP                           | GCTGTGCCACCCGATGAT    | 2626875  |               | 53                  | esxS16                                         | GTGCATGACAAGTTACAGG  | 2626572  |
| esxQ                           | TTCCAGGACCGGCCAGAT    | 3376082  | 1129          | 53                  | esxS17                                         | GGTCAGTTGTGCGTTG     | 3376431  |
|                                | GTGTCCGGGTGGTGTGGTGT  | 3377211  |               | 55                  | esxS18                                         | CTCGACCAAATTTTCGATCG | 3376920  |
| esxR                           | ACACCGGATCACCCGCTA    | 3378305  | 1420          | 53                  | esxS19                                         | ATGGGGGCCCATCAAA     | 3378651  |
| esxS                           | TGGCGGGATTGGCCGCTCT   | 3379725  |               | 58                  | esxS20                                         | TTGACGATCTGACGGC     | 3379379  |
| esxT                           | CGAACGTCGGCTTGTGCT    | 3862258  | 1453          | 53                  | esxS21                                         | CCGTCGGGACCACACA     | 3862570  |
| esxU                           | TGACGATTCCGGCGGACT    | 3863711  |               | 53                  | esxS22                                         | GGCCCCGGCCATGAAGA    | 3863387  |
| esxV                           | CGCCCACATTGAAGACTTGC  | 4059634  | 1301          | 54                  | esxS23                                         | GTATCGGGCGCCAAAG     | 4059921  |
| esxW                           | ATTCCGAGTGCTGGCCTG    | 4060935  |               | 53                  | esxS24                                         | CGTTCGTTGATCGAGG     | 4060640  |

**SUPPLEMENTARY TABLE 3: List of Ex epitopes from the Immune Epitope Database and Analysis Resource**

| Epitope Linear Sequence           | Epitope ID | Epitope Start | Epitope End | Epitope Molecule Accession | Epitope Source Molecule Name | Epitope Source Organism | Host Organism              | In Vivo 1 Process Type           | In Vivo 1 Immunogen Object Description | In Vivo 1 Immunogen Epitope Relation | In Vitro Process Type   | Antigen Source Molecule Name            | MHC Allele ID | MHC Allele Name                   | Assay Type                            | Assay Group            | PubMed ID | Author                                                                                                                                             | Year |
|-----------------------------------|------------|---------------|-------------|----------------------------|------------------------------|-------------------------|----------------------------|----------------------------------|----------------------------------------|--------------------------------------|-------------------------|-----------------------------------------|---------------|-----------------------------------|---------------------------------------|------------------------|-----------|----------------------------------------------------------------------------------------------------------------------------------------------------|------|
| AAASAIQGN<br>VTSIHSLS             | 60         | 13            | 28          | 61223745                   | ESAT-6                       | M. tb                   | Homo sapiens               | Occurrence of infectious disease | Mycobacterium tuberculosis             | Source Organism                      | Restimulat ion in vitro | 6 kDa early secretory antigenic target  |               |                                   | ELISA                                 | Cytokine Release-IL-4  | 15325505  | Yolanda LÉpez-Vidal; Samuel Ponce de Leñ-Rosales; Mauricio Casta"ñ-Arreola; M Sigfrido Rangel-Frausto; Enrique Melndez-Herrada; Eduardo Sada-Daz | 2004 |
| AAWGGSGSE<br>AYQGVQK<br>WDA       | 511        | 41            | 60          | 61223745                   | ESAT-6                       | M. tb                   | Homo sapiens Indian        | Occurrence of infectious disease | Mycobacterium tuberculosis             | Source Organism                      |                         | 6 kDa early secretory antigenic target  | 304           | HLA-Class II, allele undetermined | Intracellular cytokine staining (ICS) | Cytokine Release-IL-4  | 19944647  | Madhan Kumar; N Meenakshi; Jagadish C Sundaramurthi; Gurvinder Kaur; Narinder K Mehra; Alamelu Raja                                                | 2010 |
| AGIEAAASAI<br>QGNVTSIH            | 1559       | 9             | 26          | 61223745                   | ESAT-6                       | M. tb                   | Homo sapiens South African | Occurrence of infectious disease | Human immunodeficien cy virus 1        | Other                                |                         | 6 kDa early secretory antigenic target  |               |                                   | ELISPOT                               | Cytokine Release-IFN-g | 18419535  | Cheryl L Day; Nompumelelo Mkhwanazi; Sharon Reddy; Zenele Mncube; Mary van der Stok; Paul Klenerman; Bruce D Walker                                | 2008 |
| AIQGNVTSIH<br>SLLDEGK             | 2060       | 17            | 33          | 61223745                   | ESAT-6                       | M. tb                   | Homo sapiens South African | Occurrence of infectious disease | Human immunodeficien cy virus 1        | Other                                |                         | 6 kDa early secretory antigenic target  |               |                                   | ELISPOT                               | Cytokine Release-IFN-g | 18419535  | Cheryl L Day; Nompumelelo Mkhwanazi; Sharon Reddy; Zenele Mncube; Mary van der Stok; Paul Klenerman; Bruce D Walker                                | 2008 |
| AMASTEGNV                         | 3064       | 82            | 90          | 61223745                   | ESAT-6                       | M. tb                   | Homo sapiens               | Occurrence of infectious disease | Mycobacterium tuberculosis             | Source Organism                      |                         | 6 kDa early secretory antigenic target  | 143           | HLA-A*0201                        | Intracellular cytokine staining (ICS) | Cytokine Release-IL-2  | 19436760  | Francesco Dieli; Tom H M Ottenhoff                                                                                                                 | 2009 |
| ARTISEAGQA<br>MASTEGNVT           | 80451      | 73            | 91          | 15843506                   | ESAT-6                       | M. tb H37Rv             | Homo sapiens               | Occurrence of infectious disease | Mycobacterium tuberculosis             | Taxonomic Parent                     |                         | early secretory antigenic target, 6 kDa |               |                                   | ELISPOT                               | Cytokine Release-IFN-g |           | Deborah A. Lewinsohn (1,2); Gwendolyn M. Swarbrick (1,3); David M. Lewinsohn (2,3)                                                                 | 2009 |
| ATATELNNAL<br>QNLARTI             | 4899       | 60            | 76          | 61223745                   | ESAT-6                       | M. tb                   | Homo sapiens South African | Occurrence of infectious disease | Human immunodeficien cy virus 1        | Other                                |                         | 6 kDa early secretory antigenic target  |               |                                   | ELISPOT                               | Cytokine Release-IFN-g | 18419535  | Cheryl L Day; Nompumelelo Mkhwanazi; Sharon Reddy; Zenele Mncube; Mary van der Stok; Paul Klenerman; Bruce D Walker                                | 2008 |
| AATELNNALQ<br>NLARTISEAG<br>QAMAS | 4942       | 62            | 85          | 61223745                   | ESAT-6                       | M. tb                   | Homo sapiens               | Occurrence of infectious disease | Mycobacterium tuberculosis             | Source Organism                      | Restimulat ion in vitro | 6 kDa early secretory antigenic target  | 326           | HLA-DR                            | ELISA                                 | Cytokine Release-IFN-g | 10875783  | A S Mustafa; F Oftung; H A Amoudy; N M Madi; A T Abal; F Shaban; I Rosen Krands; P Andersen                                                        | 2000 |
| AWGGSGSEA<br>YQGVQK<br>W DATATEL  | 5661       | 42            | 65          | 61223745                   | ESAT-6                       | M. tb                   | Homo sapiens               | Occurrence of infectious disease | Mycobacterium tuberculosis             | Source Organism                      | Restimulat ion in vitro | 6 kDa early secretory antigenic target  | 326           | HLA-DR                            | ELISA                                 | Cytokine Release-IFN-g | 10875783  | A S Mustafa; F Oftung; H A Amoudy; N M Madi; A T Abal; F Shaban; I Rosen Krands; P Andersen                                                        | 2000 |
| EAAASAIQG<br>NVTSIHSLLD<br>EGKQS  | 10984      | 12            | 35          | 61223745                   | ESAT-6                       | M. tb                   | Homo sapiens               | Occurrence of infectious disease | Mycobacterium tuberculosis             | Source Organism                      | Restimulat ion in vitro | 6 kDa early secretory antigenic target  | 326           | HLA-DR                            | ELISA                                 | Cytokine Release-IFN-g | 10875783  | A S Mustafa; F Oftung; H A Amoudy; N M Madi; A T Abal; F Shaban; I Rosen Krands; P Andersen                                                        | 2000 |
| EAYQGVQK<br>W DATATEL             | 11228      | 49            | 65          | 61223745                   | ESAT-6                       | M. tb                   | Homo sapiens South African | Occurrence of infectious disease | Human immunodeficien cy virus 1        | Other                                |                         | 6 kDa early secretory antigenic target  |               |                                   | ELISPOT                               | Cytokine Release-IFN-g | 18419535  | Cheryl L Day; Nompumelelo Mkhwanazi; Sharon Reddy; Zenele Mncube; Mary van der Stok; Paul Klenerman; Bruce D Walker                                | 2008 |
| ELNNALQNL                         | 13195      | 64            | 72          | 61223745                   | ESAT-6                       | M. tb                   | Homo sapiens               | Occurrence of infectious disease | Mycobacterium tuberculosis             | Source Organism                      |                         | 6 kDa early secretory antigenic target  |               |                                   | ELISPOT                               | Cytokine Release-IFN-g | 9419365   | A Lalvani; R Brookes; R J Wilkinson; A S Malin; A A Pathan; P Andersen; H Dockrell; G Pasvol; A V Hill                                             | 1998 |
| FAGIEAAASA<br>IQGNV               | 15177      | 8             | 22          | 61223745                   | ESAT-6                       | M. tb                   | Homo sapiens               | Occurrence of infectious disease | Mycobacterium tuberculosis             | Source Organism                      | Restimulat ion in vitro | 6 kDa early secretory antigenic target  | 341           | HLA-DR4                           | ELISA                                 | Cytokine Release-IFN-g | 17444958  | H Hhn; C Kortsik; I Zehbe; W E Hitzler; K Kayser; K Freitag; C Neukirch; P Andersen; T M Doherty; M Maeurer                                       | 2007 |
| GIEAAASAIQ<br>GNVTSIHSLL<br>D     | 20242      | 10            | 30          | 61223745                   | ESAT-6                       | M. tb                   | Homo sapiens               | Occurrence of infectious disease | Mycobacterium tuberculosis             | Source Organism                      |                         | 6 kDa early secretory antigenic target  | 326           | HLA-DR                            | ELISA                                 | Cytokine Release-IFN-g | 9862331   | T Ulrichs; M E Munk; H Mollenkopf; S Behr-Perst; R Colangeli; M L Gennaro; S H Kaufmann                                                            | 1998 |
| GKQSLTKLA<br>AAWGGSGSE<br>AYQGVQ  | 20670      | 32            | 55          | 61223745                   | ESAT-6                       | M. tb                   | Homo sapiens               | Occurrence of infectious disease | Mycobacterium tuberculosis             | Source Organism                      | Restimulat ion in vitro | 6 kDa early secretory antigenic target  | 326           | HLA-DR                            | ELISA                                 | Cytokine Release-IFN-g | 10875783  | A S Mustafa; F Oftung; H A Amoudy; N M Madi; A T Abal; F Shaban; I Rosen Krands; P Andersen                                                        | 2000 |
| IEAAASAIQG<br>NVTSIHSLLD          | 25716      | 11            | 30          | 61223745                   | ESAT-6                       | M. tb                   | Homo sapiens Indian        | Occurrence of infectious disease | Mycobacterium tuberculosis             | Source Organism                      |                         | 6 kDa early secretory antigenic target  |               |                                   | Intracellular cytokine staining (ICS) | Cytokine Release-IL-4  | 19944647  | Madhan Kumar; N Meenakshi; Jagadish C Sundaramurthi; Gurvinder Kaur; Narinder K Mehra; Alamelu Raja                                                | 2010 |
| ISEAGQAMA<br>STEGNVTGM<br>FA      | 28470      | 76            | 95          | 61223745                   | ESAT-6                       | M. tb                   | Homo sapiens Indian        | Occurrence of infectious disease | Mycobacterium tuberculosis             | Source Organism                      |                         | 6 kDa early secretory antigenic target  | 304           | HLA-Class II, allele undetermined | Intracellular cytokine staining (ICS) | Cytokine Release-IL-4  | 19944647  | Madhan Kumar; N Meenakshi; Jagadish C Sundaramurthi; Gurvinder Kaur; Narinder K Mehra; Alamelu Raja                                                | 2010 |
| LARTISEAGQ<br>AMASTEGNV<br>TGMFA  | 34949      | 72            | 95          | 61223745                   | ESAT-6                       | M. tb                   | Homo sapiens               | Occurrence of infectious disease | Mycobacterium tuberculosis             | Source Organism                      |                         | 6 kDa early secretory antigenic target  | 304           | HLA-Class II, allele undetermined | ELISA                                 | Cytokine Release-IFN-g | 15699149  | Glenn Tully; Cornelius Kortsik; Hanni Hhn; Ingeborg Zehbe; W E Hitzler; Claudia Neukirch; Kirsten Freitag; Klaus Kayser; Markus J Maeurer         | 2005 |
| LDEGKQSLT<br>KLAAAWG              | 35139      | 29            | 44          | 61223745                   | ESAT-6                       | M. tb                   | Homo sapiens               | Occurrence of infectious disease | Mycobacterium tuberculosis             | Source Organism                      | Restimulat ion in vitro | 6 kDa early secretory antigenic target  |               |                                   | ELISA                                 | Cytokine Release-IL-4  | 15325505  | Yolanda LÉpez-Vidal; Samuel Ponce de Leñ-Rosales; Mauricio Casta"ñ-Arreola; M Sigfrido Rangel-Frausto; Enrique Melndez-Herrada; Eduardo Sada-Daz | 2004 |
| LLDEGKQSL                         | 37146      | 28            | 36          | 61223745                   | ESAT-6                       | M. tb                   | Homo sapiens               | Occurrence of infectious disease | Mycobacterium tuberculosis             | Source Organism                      |                         | 6 kDa early secretory antigenic target  | 235           | HLA-A2                            | MHC Tetramer/Multimer Staining        | TCR Binding            | 17444958  | H Hhn; C Kortsik; I Zehbe; W E Hitzler; K Kayser; K Freitag; C Neukirch; P Andersen; T M Doherty; M Maeurer                                       | 2007 |

| Epitope Linear Sequence                                  | Epitope ID | Epitope Start | Epitope End | Epitope Molecule Accession | Epitope Source Molecule Name | Epitope Source Organism | Host Organism              | In Vivo 1 Process Type           | In Vivo 1 Immunogen Object Description | In Vivo 1 Immunogen Epitope Relation | In Vitro Process Type  | Antigen Source Molecule Name            | MHC Allele ID     | MHC Allele Name                       | Assay Type             | Assay Group            | PubMed ID                                                                                                                                                                   | Author                                                                                                                                                                                                     | Year |
|----------------------------------------------------------|------------|---------------|-------------|----------------------------|------------------------------|-------------------------|----------------------------|----------------------------------|----------------------------------------|--------------------------------------|------------------------|-----------------------------------------|-------------------|---------------------------------------|------------------------|------------------------|-----------------------------------------------------------------------------------------------------------------------------------------------------------------------------|------------------------------------------------------------------------------------------------------------------------------------------------------------------------------------------------------------|------|
| LQNLARTISEAGQAMASTE<br>GNVT                              | 85735      | 69            | 91          | 15843506                   | ESAT-6                       | M. tb H37Rv             | Homo sapiens               | Occurrence of infectious disease | Mycobacterium tuberculosis             | Taxonomic Parent                     |                        | early secretory antigenic target, 6 kDa |                   |                                       | ELISPOT                | Cytokine Release-IFN-g |                                                                                                                                                                             | Deborah A. Lewinsohn (1,2); Gwendolyn M. Swarbrick (1,3); David M. Lewinsohn (2,3)                                                                                                                         | 2009 |
| MTEQQWNFAGIEAAASAI<br>QGNVTSI                            | 42798      | 1             | 25          | 61223745                   | ESAT-6                       | M. tb H37Rv             | Homo sapiens               | Occurrence of infectious disease | Mycobacterium tuberculosis             | Taxonomic Parent                     |                        | 6 kDa early secretory antigenic target  |                   |                                       | ELISA                  | Cytokine Release-IFN-g | 18408395                                                                                                                                                                    | Shumaila N M Hanif; Abdulsalam M El-Shammy; Rajaa Al-Attayah; Abu S Mustafa                                                                                                                                | 2008 |
| NALQNLARTISEAGQAMA                                       | 43211      | 67            | 84          | 61223745                   | ESAT-6                       | M. tb                   | Homo sapiens South African | Occurrence of infectious disease | Human immunodeficiency virus 1         | Other                                |                        | 6 kDa early secretory antigenic target  |                   |                                       | ELISPOT                | Cytokine Release-IFN-g | 18419535                                                                                                                                                                    | Cheryl L Day; Nompumelelo Mkhwanazi; Sharon Reddy; Zenele Mncube; Mary van der Stok; Paul Klenerman; Bruce D Walker                                                                                        | 2008 |
| NLARTISEAGQAMASTE<br>GNV                                 | 44653      | 71            | 90          | 61223745                   | ESAT-6                       | M. tb                   | Homo sapiens Indian        | Occurrence of infectious disease | Mycobacterium tuberculosis             | Source Organism                      |                        | 6 kDa early secretory antigenic target  | HLA-Class II, 304 | Intracellular cytokine staining (ICS) | Cytokine Release-IL-4  | 19944647               | Madhan Kumar; N Meenakshi; Jagadish C Sundaramurthi; Gurvinder Kaur; Narinder K Mehra; Alamelu Raja                                                                         | 2010                                                                                                                                                                                                       |      |
| NNALQNLARTISEAG<br>NVT<br>SIHSLLD<br>EGKQSLTKLA          | 106686     | 66            | 80          | 61223745                   | ESAT-6                       | M. tb                   | Homo sapiens               | Occurrence of disease            |                                        |                                      |                        | 6 kDa early secretory antigenic target  | HLA-419 DRB1*1101 | ELISPOT                               | Cytokine Release-IFN-g | 19536643               | Kyra Oswald-Richter; Hiroe Sato; Rana Hajizadeh; Bryan E Shepherd; John Sidney; Alessandro Sette; Lee S Newman; Wonder Puryear Drake                                        | 2010                                                                                                                                                                                                       |      |
| EGKQSLTKLA                                               | 46501      | 21            | 40          | 61223745                   | ESAT-6                       | M. tb                   | Homo sapiens Indian        | Occurrence of infectious disease | Mycobacterium tuberculosis             | Source Organism                      |                        | 6 kDa early secretory antigenic target  |                   | Intracellular cytokine staining (ICS) | Cytokine Release-IL-4  | 19944647               | Madhan Kumar; N Meenakshi; Jagadish C Sundaramurthi; Gurvinder Kaur; Narinder K Mehra; Alamelu Raja                                                                         | 2010                                                                                                                                                                                                       |      |
| QAMASTE<br>GNVTGMFA                                      | 50318      | 81            | 95          | 61223745                   | ESAT-6                       | M. tb                   | Homo sapiens South African | Occurrence of infectious disease | Human immunodeficiency virus 1         | Other                                |                        | 6 kDa early secretory antigenic target  |                   |                                       | ELISPOT                | Cytokine Release-IFN-g | 18419535                                                                                                                                                                    | Cheryl L Day; Nompumelelo Mkhwanazi; Sharon Reddy; Zenele Mncube; Mary van der Stok; Paul Klenerman; Bruce D Walker                                                                                        | 2008 |
| QGVQKWD<br>ATATELNNAL<br>QNLART                          | 50981      | 52            | 75          | 61223745                   | ESAT-6                       | M. tb                   | Homo sapiens               | Occurrence of infectious disease | Mycobacterium tuberculosis             | Source Organism                      | Restimulation in vitro | 6 kDa early secretory antigenic target  | 326 HLA-DR        | ELISA                                 | Cytokine Release-IFN-g | 10875783               | A S Mustafa; F Oftung; H A Amoudy; N M Madi; A T Abal; F Shaban; I Rosen Krands; P Andersen                                                                                 | 2000                                                                                                                                                                                                       |      |
| SIHSLLD<br>EGKQSLTKLAA                                   | 58534      | 24            | 41          | 61223745                   | ESAT-6                       | M. tb                   | Homo sapiens South African | Occurrence of infectious disease | Human immunodeficiency virus 1         | Other                                |                        | 6 kDa early secretory antigenic target  |                   |                                       | ELISPOT                | Cytokine Release-IFN-g | 18419535                                                                                                                                                                    | Cheryl L Day; Nompumelelo Mkhwanazi; Sharon Reddy; Zenele Mncube; Mary van der Stok; Paul Klenerman; Bruce D Walker                                                                                        | 2008 |
| STEGNVTGMFA                                              | 61578      | 85            | 95          | 61223745                   | ESAT-6                       | M. tb                   | Homo sapiens               | Occurrence of infectious disease | Mycobacterium tuberculosis             | Source Organism                      | Restimulation in vitro | 6 kDa early secretory antigenic target  |                   |                                       | ELISA                  | Cytokine Release-IL-4  | 15325505                                                                                                                                                                    | Yolanda L pez-Vidal; Samuel Ponce de Le n-Rosales; Mauricio Casta n-Arreola; M Sigfrido Rangel-Frausto; Enrique Mel ndez-Herrada; Eduardo Sada-D az                                                        | 2004 |
| TATELNNAL<br>QNLARTISEAG                                 | 63010      | 61            | 80          | 61223745                   | ESAT-6                       | M. tb                   | Homo sapiens Indian        | Occurrence of infectious disease | Mycobacterium tuberculosis             | Source Organism                      |                        | 6 kDa early secretory antigenic target  | HLA-Class II, 304 | Intracellular cytokine staining (ICS) | Cytokine Release-IL-4  | 19944647               | Madhan Kumar; N Meenakshi; Jagadish C Sundaramurthi; Gurvinder Kaur; Narinder K Mehra; Alamelu Raja                                                                         | 2010                                                                                                                                                                                                       |      |
| TISEAGQAMASTE<br>GNV                                     | 64457      | 75            | 90          | 61223745                   | ESAT-6                       | M. tb                   | Homo sapiens South African | Occurrence of infectious disease | Human immunodeficiency virus 1         | Other                                |                        | 6 kDa early secretory antigenic target  |                   |                                       | ELISPOT                | Cytokine Release-IFN-g | 18419535                                                                                                                                                                    | Cheryl L Day; Nompumelelo Mkhwanazi; Sharon Reddy; Zenele Mncube; Mary van der Stok; Paul Klenerman; Bruce D Walker                                                                                        | 2008 |
| VQKWD<br>ATATELNNAL<br>VTSIHSLLD<br>EGKQSLTKLAA<br>AAWGG | 70631      | 54            | 69          | 61223745                   | ESAT-6                       | M. tb                   | Homo sapiens South African | Occurrence of infectious disease | Human immunodeficiency virus 1         | Other                                |                        | 6 kDa early secretory antigenic target  |                   |                                       | ELISPOT                | Cytokine Release-IFN-g | 18419535                                                                                                                                                                    | Cheryl L Day; Nompumelelo Mkhwanazi; Sharon Reddy; Zenele Mncube; Mary van der Stok; Paul Klenerman; Bruce D Walker                                                                                        | 2008 |
| AAWGG                                                    | 71492      | 22            | 45          | 61223745                   | ESAT-6                       | M. tb                   | Homo sapiens               | Occurrence of infectious disease | Mycobacterium tuberculosis             | Source Organism                      | Restimulation in vitro | 6 kDa early secretory antigenic target  | 326 HLA-DR        | ELISA                                 | Cytokine Release-IFN-g | 10875783               | A S Mustafa; F Oftung; H A Amoudy; N M Madi; A T Abal; F Shaban; I Rosen Krands; P Andersen                                                                                 | 2000                                                                                                                                                                                                       |      |
| WNFAGIEAA<br>ASAIQGNVT<br>SIHSL                          | 72888      | 6             | 28          | 61223745                   | ESAT-6                       | M. tb                   | Homo sapiens               | Occurrence of infectious disease | Mycobacterium tuberculosis             | Source Organism                      |                        | 6 kDa early secretory antigenic target  | HLA-Class II, 304 | undetermined                          | ELISPOT                | Cytokine Release-IFN-g | 12865946                                                                                                                                                                    | Donatella Vincenti; Stefania Carrara; Patrizia De Mori; Leopoldo P Pucillo; Nicola Petrosillo; Fabrizio Palmieri; Orlando Armignacco; Giuseppe Ippolito; Enrico Girardi; Massimo Amicosante; Delia Goletti | 2003 |
| AANKQKQEL<br>DEISTNIRQA<br>G                             | 327        | 61            | 80          | 15611010                   | EsxB                         | M. tb                   | Homo sapiens               | Occurrence of infectious disease | Mycobacterium tuberculosis             | Source Organism                      |                        | 10 kDa culture filtrate antigen EsxB    |                   | Intracellular cytokine staining (ICS) | Cytokine Release-IL-4  | 19902247               | Madhan Kumar; Jagadish C Sundaramurthi; Narinder K Mehra; Gurvinder Kaur; Alamelu Raja                                                                                      | 2010                                                                                                                                                                                                       |      |
| AAVVRFQEA<br>ANKQKQEL                                    | 506        | 53            | 69          | 61223749                   | esxB                         | M. tb                   | Homo sapiens South African | Occurrence of infectious disease | Human immunodeficiency virus 1         | Other                                |                        | ESAT-6-like protein esxB                |                   | Intracellular cytokine staining (ICS) | Cytokine Release-IL-2  | 18419535               | Cheryl L Day; Nompumelelo Mkhwanazi; Sharon Reddy; Zenele Mncube; Mary van der Stok; Paul Klenerman; Bruce D Walker                                                         | 2008                                                                                                                                                                                                       |      |
| ADEEQQAL<br>SSQMGF                                       | 655        | 86            | 100         | 61223749                   | esxB                         | M. tb H37Rv             | Homo sapiens               | Occurrence of infectious disease | Mycobacterium tuberculosis             | Taxonomic Parent                     |                        | ESAT-6-like protein esxB                |                   |                                       | ELISPOT                | Cytokine Release-IFN-g | 15265931                                                                                                                                                                    | Homayoun Shams; Peter Klucar; Steven E Weis; Ajit Lalvani; Patrick K Moonan; Hassan Safi; Benjamin Wizel; Katie Ewer; Gerald T Nepom; David M Lewinsohn; Peter Andersen; Peter F Barnes                    | 2004 |
| AEMKTDAA<br>T<br>LA                                      | 1080       | 2             | 12          | 61223749                   | esxB                         | M. tb                   | Homo sapiens               | Occurrence of infectious disease | Mycobacterium tuberculosis             | Source Organism                      |                        | ESAT-6-like protein esxB                | 36 HLA-B*4501     | ELISPOT                               | Cytokine Release-IFN-g | 17892322               | Deborah A Lewinsohn; Ervina Winata; Gwendolyn M Swarbrick; Katie E Tanner; Matthew S Cook; Megan D Null; Meghan E Cansler; Alessandro Sette; John Sidney; David M Lewinsohn | 2007                                                                                                                                                                                                       |      |

| Epitope Linear Sequence                                | Epitope ID     | Epitope Start | Epitope End | Epitope Molecule Accession | Epitope Source Molecule Name | Epitope Source Organism | Host Organism              | In Vivo 1 Process Type           | In Vivo 1 Immunogen Object Description | In Vivo 1 Immunogen Epitope Relation | In Vitro Process Type | Antigen Source Molecule Name                                                 | MHC Allele ID  | MHC Allele Name | Assay Type                                       | Assay Group                                     | PubMed ID | Author                                                                                                                                                                                  | Year |
|--------------------------------------------------------|----------------|---------------|-------------|----------------------------|------------------------------|-------------------------|----------------------------|----------------------------------|----------------------------------------|--------------------------------------|-----------------------|------------------------------------------------------------------------------|----------------|-----------------|--------------------------------------------------|-------------------------------------------------|-----------|-----------------------------------------------------------------------------------------------------------------------------------------------------------------------------------------|------|
| AGSLQGQW<br>RGAAGTA                                    | 1681           | 36            | 50          | 61223749                   | esxB                         | M. tb H37Rv             | Homo sapiens               | Occurrence of infectious disease | Mycobacterium tuberculosis             | Taxonomic Parent                     |                       | ESAT-6-like protein esxB                                                     |                |                 | ELISPOT                                          | Cytokine Release-IFN-g                          | 15265931  | Homayoun Shams; Peter Klucar; Steven E Weis; Ajit Lalvani; Patrick K Moonan; Hassan Safi; Benjamin Wizel; Katie Ewer; Gerald T Nepom; David M Lewinsohn; Peter Andersen; Peter F Barnes | 2004 |
| AQAAVVRFQ<br>EAANKQKQE<br>LD                           | 3935           | 51            | 70          | 15611010                   | EsxB                         | M. tb                   | Homo sapiens               | Occurrence of infectious disease | Mycobacterium tuberculosis             | Source Organism                      |                       | 10 kDa culture filtrate antigen EsxB                                         |                |                 | Intracellular cytokine staining (ICS)            | Cytokine Release-IL-4                           | 19902247  | Madhan Kumar; Jagadish C Sundaramurthi; Narinder K Mehra; Gurvinder Kaur; Alamelu Raja                                                                                                  | 2010 |
| ATLAQEAGN<br>FERISGDLK                                 | 5028           | 9             | 26          | 61223749                   | esxB                         | M. tb                   | Homo sapiens South African | Occurrence of infectious disease | Human immunodeficiency virus 1         | Other                                |                       | ESAT-6-like protein esxB                                                     |                |                 | ELISPOT                                          | Cytokine Release-IFN-g                          | 18419535  | Cheryl L Day; Nompumelelo Mkhwanazi; Sharon Reddy; Zenele Mncube; Mary van der Stok; Paul Klenerman; Bruce D Walker                                                                     | 2008 |
| DQVESTAGS<br>LQGQWRGA<br>A                             | 9920           | 30            | 47          | 61223749                   | esxB                         | M. tb                   | Homo sapiens South African | Occurrence of infectious disease | Human immunodeficiency virus 1         | Other                                |                       | ESAT-6-like protein esxB                                                     |                |                 | Intracellular cytokine staining (ICS)            | Cytokine Release-IL-2                           | 18419535  | Cheryl L Day; Nompumelelo Mkhwanazi; Sharon Reddy; Zenele Mncube; Mary van der Stok; Paul Klenerman; Bruce D Walker                                                                     | 2008 |
| EAANKQKQE<br>LDEISTNIR                                 | 10994          | 60            | 77          | 61223749                   | esxB                         | M. tb                   | Homo sapiens South African | Occurrence of infectious disease | Human immunodeficiency virus 1         | Other                                |                       | ESAT-6-like protein esxB                                                     |                |                 | ELISPOT                                          | Cytokine Release-IFN-g                          | 18419535  | Cheryl L Day; Nompumelelo Mkhwanazi; Sharon Reddy; Zenele Mncube; Mary van der Stok; Paul Klenerman; Bruce D Walker                                                                     | 2008 |
| EISTNIRQAG<br>VQYSRADEE<br>Q                           | 12585          | 71            | 90          | 15611010                   | EsxB                         | M. tb                   | Homo sapiens               | Occurrence of infectious disease | Mycobacterium tuberculosis             | Source Organism                      |                       | 10 kDa culture filtrate antigen EsxB                                         |                |                 | Intracellular cytokine staining (ICS)            | Cytokine Release-IL-4                           | 19902247  | Madhan Kumar; Jagadish C Sundaramurthi; Narinder K Mehra; Gurvinder Kaur; Alamelu Raja                                                                                                  | 2010 |
| ELDEISTNIR<br>QAGVQYSR                                 | 12979          | 68            | 85          | 61223749                   | esxB                         | M. tb                   | Homo sapiens South African | Occurrence of infectious disease | Human immunodeficiency virus 1         | Other                                |                       | ESAT-6-like protein esxB                                                     |                |                 | ELISPOT                                          | Cytokine Release-IFN-g                          | 18419535  | Cheryl L Day; Nompumelelo Mkhwanazi; Sharon Reddy; Zenele Mncube; Mary van der Stok; Paul Klenerman; Bruce D Walker                                                                     | 2008 |
| EMKTDAA TL<br>GAAGTAAQA<br>AVVRFQEAA<br>N              | 13386<br>82519 | 3<br>45       | 11<br>63    | 61223749<br>15611010       | esxB<br>EsxB                 | M. tb<br>M. tb H37Rv    | Homo sapiens               | Occurrence of infectious disease | Mycobacterium tuberculosis             | Source Organism<br>Taxonomic Parent  |                       | ESAT-6-like protein esxB<br>10 kDa culture filtrate antigen EsxB             | 252 HLA-B*0801 |                 | ELISPOT                                          | Cytokine Release-IFN-g                          | 17892322  | Deborah A Lewinsohn; Ervina Winata; Gwendolyn M Swarbrick; Katie E Tanner; Matthew S Cook; Megan D Null; Meghan E Cansler; Alessandro Sette; John Sidney; David M Lewinsohn             | 2007 |
| GDLKTQIDQ<br>VESTAGSL                                  | 19028          | 23            | 39          | 61223749                   | esxB                         | M. tb                   | Homo sapiens South African | Occurrence of infectious disease | Human immunodeficiency virus 1         | Other                                |                       | ESAT-6-like protein esxB                                                     |                |                 | ELISPOT                                          | Cytokine Release-IFN-g                          | 18419535  | Cheryl L Day; Nompumelelo Mkhwanazi; Sharon Reddy; Zenele Mncube; Mary van der Stok; Paul Klenerman; Bruce D Walker                                                                     | 2008 |
| GNERISGDL<br>KTQID                                     | 21422          | 16            | 30          | 61223749                   | esxB                         | M. tb H37Rv             | Homo sapiens               | Occurrence of infectious disease | Mycobacterium tuberculosis             | Taxonomic Parent                     |                       | ESAT-6-like protein esxB                                                     |                |                 | ELISPOT                                          | Cytokine Release-IFN-g                          | 15265931  | Homayoun Shams; Peter Klucar; Steven E Weis; Ajit Lalvani; Patrick K Moonan; Hassan Safi; Benjamin Wizel; Katie Ewer; Gerald T Nepom; David M Lewinsohn; Peter Andersen; Peter F Barnes | 2004 |
| GQWRGAAG<br>TAAQA AVVR<br>FQE                          | 21976          | 41            | 60          | 15611010                   | EsxB                         | M. tb                   | Homo sapiens               | Occurrence of infectious disease | Mycobacterium tuberculosis             | Source Organism                      |                       | 10 kDa culture filtrate antigen EsxB                                         |                |                 | Intracellular cytokine staining (ICS)            | Cytokine Release-IL-4                           | 19902247  | Madhan Kumar; Jagadish C Sundaramurthi; Narinder K Mehra; Gurvinder Kaur; Alamelu Raja                                                                                                  | 2010 |
| ISGDLKTQID<br>QVESTAGSL<br>Q                           | 28506          | 21            | 40          | 15611010                   | EsxB                         | M. tb                   | Homo sapiens               | Occurrence of infectious disease | Mycobacterium tuberculosis             | Source Organism                      |                       | 10 kDa culture filtrate antigen EsxB                                         |                |                 | Intracellular cytokine staining (ICS)            | Cytokine Release-IL-4                           | 19902247  | Madhan Kumar; Jagadish C Sundaramurthi; Narinder K Mehra; Gurvinder Kaur; Alamelu Raja                                                                                                  | 2010 |
| KQELDEISTN<br>IRQAG                                    | 32971          | 66            | 80          | 61223749                   | esxB                         | M. tb H37Rv             | Homo sapiens               | Occurrence of infectious disease | Mycobacterium tuberculosis             | Taxonomic Parent                     |                       | ESAT-6-like protein esxB                                                     |                |                 | ELISPOT                                          | Cytokine Release-IFN-g                          | 15265931  | Homayoun Shams; Peter Klucar; Steven E Weis; Ajit Lalvani; Patrick K Moonan; Hassan Safi; Benjamin Wizel; Katie Ewer; Gerald T Nepom; David M Lewinsohn; Peter Andersen; Peter F Barnes | 2004 |
| KTQIDQVEST<br>AGSLQ                                    | 33831          | 26            | 40          | 61223749                   | esxB                         | M. tb H37Rv             | Homo sapiens               | Occurrence of infectious disease | Mycobacterium tuberculosis             | Taxonomic Parent                     |                       | ESAT-6-like protein esxB                                                     |                |                 | ELISPOT                                          | Cytokine Release-IFN-g                          | 15265931  | Homayoun Shams; Peter Klucar; Steven E Weis; Ajit Lalvani; Patrick K Moonan; Hassan Safi; Benjamin Wizel; Katie Ewer; Gerald T Nepom; David M Lewinsohn; Peter Andersen; Peter F Barnes | 2004 |
| LAQEAGNFE<br>RISGDLKTQI<br>D                           | 34928          | 11            | 30          | 15611010                   | EsxB                         | M. tb                   | Homo sapiens               | Occurrence of infectious disease | Mycobacterium tuberculosis             | Source Organism                      |                       | 10 kDa culture filtrate antigen EsxB                                         |                |                 | Intracellular cytokine staining (ICS)            | Cytokine Release-IL-4                           | 19902247  | Madhan Kumar; Jagadish C Sundaramurthi; Narinder K Mehra; Gurvinder Kaur; Alamelu Raja                                                                                                  | 2010 |
| LDEISTNIRQ<br>AGVQYSRAD<br>MAEMKTD<br>ATLAQEAGN<br>FER | 85043<br>41030 | 69<br>1       | 87<br>20    | 15611010<br>15611010       | EsxB<br>EsxB                 | M. tb H37Rv<br>M. tb    | Homo sapiens               | Occurrence of infectious disease | Mycobacterium tuberculosis             | Taxonomic Parent<br>Source Organism  |                       | 10 kDa culture filtrate antigen EsxB<br>10 kDa culture filtrate antigen EsxB |                |                 | ELISPOT<br>Intracellular cytokine staining (ICS) | Cytokine Release-IFN-g<br>Cytokine Release-IL-4 | 19902247  | Deborah A. Lewinsohn (1,2); Gwendolyn M. Swarbrick (1,3); David M. Lewinsohn (2,3)<br>Madhan Kumar; Jagadish C Sundaramurthi; Narinder K Mehra; Gurvinder Kaur; Alamelu Raja            | 2009 |
| NFERISGDLK<br>TQIDQV                                   | 43829          | 17            | 32          | 61223749                   | esxB                         | M. tb                   | Homo sapiens South African | Occurrence of infectious disease | Human immunodeficiency virus 1         | Other                                |                       | ESAT-6-like protein esxB                                                     |                |                 | ELISPOT                                          | Cytokine Release-IFN-g                          | 18419535  | Cheryl L Day; Nompumelelo Mkhwanazi; Sharon Reddy; Zenele Mncube; Mary van der Stok; Paul Klenerman; Bruce D Walker                                                                     | 2008 |



| Epitope Linear Sequence                  | Epitope ID | Epitope Start | Epitope End | Epitope Molecule Accession | Epitope Source Molecule Name | Epitope Source Organism | Host Organism              | In Vivo 1 Process Type           | In Vivo 1 Immunogen Object Description | In Vivo 1 Immunogen Epitope Relation | In Vitro Process Type  | Antigen Source Molecule Name                       | MHC Allele ID | MHC Allele Name                   | Assay Type                            | Assay Group            | PubMed ID | Author                                                                                                                                                                                 | Year |
|------------------------------------------|------------|---------------|-------------|----------------------------|------------------------------|-------------------------|----------------------------|----------------------------------|----------------------------------------|--------------------------------------|------------------------|----------------------------------------------------|---------------|-----------------------------------|---------------------------------------|------------------------|-----------|----------------------------------------------------------------------------------------------------------------------------------------------------------------------------------------|------|
| NIRQAGVQY QVESTAGSL QGQWRGAA GTA         | 44327      | 75            | 83          | 61223749                   | esxB                         | M. tb                   | Homo sapiens               | Occurrence of infectious disease | Mycobacterium tuberculosis             | Source Organism                      |                        | ESAT-6-like protein esxB                           | 258           | HLA-B*1502                        | ELISPOT                               | Cytokine Release-IFN-g | 17892322  | Deborah A Lewinsohn; Ervina Winata; Gwendolyn M Swarbrick; Katie E Tanner; Matthew S Cook; Megan D Null; Meghan E Cansler; Alessandro Sette; John Sidney; David M Lewinsohn            | 2007 |
|                                          | 52690      | 31            | 50          | 15611010                   | EsxB                         | M. tb                   | Homo sapiens               | Occurrence of infectious disease | Mycobacterium tuberculosis             | Source Organism                      |                        | 10 kDa culture filtrate antigen EsxB               |               |                                   | Intracellular cytokine staining (ICS) | Cytokine Release-IL-4  | 19902247  | Madhan Kumar; Jagadish C Sundaramurthi; Narinder K Mehra; Gurvinder Kaur; Alamelu Raja                                                                                                 | 2010 |
| RADEEQQQA L                              | 53077      | 85            | 94          | 61223749                   | esxB                         | M. tb                   | Homo sapiens               | Occurrence of infectious disease | Mycobacterium tuberculosis             | Source Organism                      |                        | ESAT-6-like protein esxB                           | 275           | HLA-B14                           | ELISPOT                               | Cytokine Release-IFN-g | 17892322  | Deborah A Lewinsohn; Ervina Winata; Gwendolyn M Swarbrick; Katie E Tanner; Matthew S Cook; Megan D Null; Meghan E Cansler; Alessandro Sette; John Sidney; David M Lewinsohn            | 2007 |
| SLQGQWRG AAGTAAQAA V                     | 59414      | 38            | 55          | 61223749                   | esxB                         | M. tb                   | Homo sapiens South African | Occurrence of infectious disease | Human immunodeficiency virus 1         | Other                                |                        | ESAT-6-like protein esxB                           |               |                                   | ELISPOT                               | Cytokine Release-IFN-g | 18419535  | Cheryl L Day; Nompumelelo Mkhwanazi; Sharon Reddy; Zenele Mncube; Mary van der Stok; Paul Klenerman; Bruce D Walker                                                                    | 2008 |
| SRADEEQQQ ALSSQMGF                       | 60616      | 84            | 100         | 61223749                   | esxB                         | M. tb                   | Homo sapiens South African | Occurrence of infectious disease | Human immunodeficiency virus 1         | Other                                |                        | ESAT-6-like protein esxB                           |               |                                   | ELISPOT                               | Cytokine Release-IFN-g | 18419535  | Cheryl L Day; Nompumelelo Mkhwanazi; Sharon Reddy; Zenele Mncube; Mary van der Stok; Paul Klenerman; Bruce D Walker                                                                    | 2008 |
| STNIRQAGV QYSRAD                         | 61782      | 73            | 87          | 61223749                   | esxB                         | M. tb                   | Homo sapiens               | Occurrence of infectious disease | Mycobacterium tuberculosis             | Source Organism                      | Restimulation in vitro |                                                    | 304           | HLA-Class II, allele undetermined | ELISA                                 | Cytokine Release-IFN-g | 12969871  | Deborah A Lewinsohn; Amy S Heinzel; James M Gardner; Liqing Zhu; Mark R Alderson; David M Lewinsohn                                                                                    | 2003 |
| TAAQAAVVR F                              | 62797      | 49            | 58          | 61223749                   | esxB                         | M. tb                   | Homo sapiens               | Occurrence of infectious disease | Mycobacterium tuberculosis             | Source Organism                      |                        | ESAT-6-like protein esxB                           | 199           | HLA-B*3514                        | ELISPOT                               | Cytokine Release-IFN-g | 17892322  | Deborah A Lewinsohn; Ervina Winata; Gwendolyn M Swarbrick; Katie E Tanner; Matthew S Cook; Megan D Null; Meghan E Cansler; Alessandro Sette; John Sidney; David M Lewinsohn            | 2007 |
| TDAATLAQE AGNFER                         | 63109      | 6             | 20          | 61223749                   | esxB                         | M. tb H37Rv             | Homo sapiens               | Occurrence of infectious disease | Mycobacterium tuberculosis             | Taxonomic Parent                     |                        | ESAT-6-like protein esxB                           |               |                                   | ELISPOT                               | Cytokine Release-IFN-g | 15265931  | Homayoun Shams; Peter Klucar; Steven E Weis; Ajit Lalvani; Patrick K Moonan; Hassan Safi; Benjamin Wize; Katie Ewer; Gerald T Nepom; David M Lewinsohn; Peter Andersen; Peter F Barnes | 2004 |
| VQYSRADEE QQALSSQMGF                     | 70687      | 81            | 100         | 15611010                   | EsxB                         | M. tb                   | Homo sapiens               | Occurrence of infectious disease | Mycobacterium tuberculosis             | Source Organism                      |                        | ESAT-6-like protein esxB                           |               |                                   | Intracellular cytokine staining (ICS) | Cytokine Release-IL-4  | 19902247  | Madhan Kumar; Jagadish C Sundaramurthi; Narinder K Mehra; Gurvinder Kaur; Alamelu Raja                                                                                                 | 2010 |
| VRFQEAANK QKQELD                         | 70720      | 56            | 70          | 61223749                   | esxB                         | M. tb H37Rv             | Homo sapiens               | Occurrence of infectious disease | Mycobacterium tuberculosis             | Taxonomic Parent                     |                        | ESAT-6-like protein esxB                           |               |                                   | ELISPOT                               | Cytokine Release-IFN-g | 15265931  | Homayoun Shams; Peter Klucar; Steven E Weis; Ajit Lalvani; Patrick K Moonan; Hassan Safi; Benjamin Wize; Katie Ewer; Gerald T Nepom; David M Lewinsohn; Peter Andersen; Peter F Barnes | 2004 |
| AAGTAAQAA VVRFQEAANK KQKQELD             | 189        | 46            | 70          | 2960226                    | ESXB (LHP) (CFP10)           | M. tb H37Rv             | Homo sapiens               | Occurrence of infectious disease | Mycobacterium tuberculosis             | Taxonomic Parent                     |                        | 10 KDA CULTURE FILTRATE ANTIGEN ESXB (LHP) (CFP10) |               |                                   | ELISA                                 | Cytokine Release-IFN-g | 18408395  | Shumaila N M Hanif; Abdulsalam M El-Shammy; Rajaa Al-Attiyah; Abu S Mustafa                                                                                                            | 2008 |
| AAHARFVAA                                | 194        | 53            | 61          | 81669511                   | esxG                         | M. tb                   | Homo sapiens               | Occurrence of infectious disease | Mycobacterium tuberculosis             | Source Organism                      |                        | Hypothetical protein esxG                          | 252           | HLA-B*0801                        | ELISPOT                               | Cytokine Release-IFN-g | 17892322  | Deborah A Lewinsohn; Ervina Winata; Gwendolyn M Swarbrick; Katie E Tanner; Matthew S Cook; Megan D Null; Meghan E Cansler; Alessandro Sette; John Sidney; David M Lewinsohn            | 2007 |
| LLDAHIPQL                                | 37140      | 3             | 11          | 81669511                   | esxG                         | M. tb                   | Homo sapiens               | Occurrence of infectious disease | Mycobacterium tuberculosis             | Source Organism                      |                        | Hypothetical protein esxG                          | 143           | HLA-A*0201                        | ELISPOT                               | Cytokine Release-IFN-g | 17892322  | Deborah A Lewinsohn; Ervina Winata; Gwendolyn M Swarbrick; Katie E Tanner; Matthew S Cook; Megan D Null; Meghan E Cansler; Alessandro Sette; John Sidney; David M Lewinsohn            | 2007 |
| AMEDLVRAY HAMSSTHEA AMSSTHEAN TMAMMARD T | 3081       | 61            | 78          | 61223751                   | esxH                         | M. tb H37Rv             | Homo sapiens               | Occurrence of infectious disease | Mycobacterium tuberculosis H37Rv       | Source Organism                      |                        | ESAT-6-like protein esxH                           |               |                                   | ELISPOT                               | Cytokine Release-IFN-g | 12228269  | Rikke Louise Vinther SkjØt; Inger Brock; Sandra M Arend; Martin E Munk; Michael Theisen; Tom H M Ottenhoff; Peter Andersen                                                             | 2002 |
|                                          | 3196       | 71            | 88          | 61223751                   | esxH                         | M. tb H37Rv             | Homo sapiens               | Occurrence of infectious disease | Mycobacterium tuberculosis H37Rv       | Source Organism                      |                        | ESAT-6-like protein esxH                           |               |                                   | ELISPOT                               | Cytokine Release-IFN-g | 12228269  | Rikke Louise Vinther SkjØt; Inger Brock; Sandra M Arend; Martin E Munk; Michael Theisen; Tom H M Ottenhoff; Peter Andersen                                                             | 2002 |
| EIAVEQAALQ SAWQGDITG                     | 12402      | 31            | 48          | 61223751                   | esxH                         | M. tb H37Rv             | Homo sapiens               | Occurrence of infectious disease | Mycobacterium tuberculosis H37Rv       | Source Organism                      |                        | ESAT-6-like protein esxH                           |               |                                   | ELISPOT                               | Cytokine Release-IFN-g | 12228269  | Rikke Louise Vinther SkjØt; Inger Brock; Sandra M Arend; Martin E Munk; Michael Theisen; Tom H M Ottenhoff; Peter Andersen                                                             | 2002 |
| MAMMARDT AEAANKWGG                       | 41089      | 81            | 96          | 61223751                   | esxH                         | M. tb H37Rv             | Homo sapiens               | Occurrence of infectious disease | Mycobacterium tuberculosis H37Rv       | Source Organism                      |                        | ESAT-6-like protein esxH                           |               |                                   | ELISPOT                               | Cytokine Release-IFN-g | 12228269  | Rikke Louise Vinther SkjØt; Inger Brock; Sandra M Arend; Martin E Munk; Michael Theisen; Tom H M Ottenhoff; Peter Andersen                                                             | 2002 |
| YAGTLQSLG AEIAVEQAA                      | 73362      | 21            | 38          | 61223751                   | esxH                         | M. tb H37Rv             | Homo sapiens               | Occurrence of infectious disease | Mycobacterium tuberculosis H37Rv       | Source Organism                      |                        | ESAT-6-like protein esxH                           |               |                                   | ELISPOT                               | Cytokine Release-IFN-g | 12228269  | Rikke Louise Vinther SkjØt; Inger Brock; Sandra M Arend; Martin E Munk; Michael Theisen; Tom H M Ottenhoff; Peter Andersen                                                             | 2002 |

| Epitope Linear Sequence                   | Epitope ID | Epitope Start | Epitope End | Epitope Molecule Accession | Epitope Source Molecule Name | Epitope Source Organism | Host Organism | In Vivo 1 Process Type           | In Vivo 1 Immunogen Object Description | In Vivo 1 Immunogen Epitope Relation | In Vitro Process Type | Antigen Source Molecule Name                     | MHC Allele ID | MHC Allele Name | Assay Type | Assay Group            | PubMed ID | Author                                                                                                                     | Year |
|-------------------------------------------|------------|---------------|-------------|----------------------------|------------------------------|-------------------------|---------------|----------------------------------|----------------------------------------|--------------------------------------|-----------------------|--------------------------------------------------|---------------|-----------------|------------|------------------------|-----------|----------------------------------------------------------------------------------------------------------------------------|------|
| AFRNIVNML<br>DCGTIRVGSF<br>RGRWLDPRH<br>A | 124973     | 63            | 71          | 15608178                   | esxJ (Esat-6 like protein 2) | M. tb H37Rv             | Homo sapiens  | Occurrence of infectious disease | Mycobacterium tuberculosis H37Rv       | Source Organism                      |                       | Esat-6 like protein esxJ (Esat-6 like protein 2) | HLA-311       | Cw*0602         | ELISPOT    | Cytokine Release-IFN-g |           | Deborah A. Lewinsohn M.D.; Meghan E. Cansler; Megan Null; Gwendolyn Swarbrick; David Lewinsohn M.D., Ph.D.                 | 2010 |
| DIASERTAPS<br>RACQGDLG<br>MS              | 7703       | 91            | 110         | 54040982                   | esxQ                         | M. tb H37Rv             | Homo sapiens  | Occurrence of infectious disease | Mycobacterium tuberculosis H37Rv       | Source Organism                      |                       | ESAT-6-like protein esxQ                         |               |                 | ELISPOT    | Cytokine Release-IFN-g | 12228269  | Rikke Louise Vinther SkjØt; Inger Brock; Sandra M Arend; Martin E Munk; Michael Theisen; Tom H M Ottenhoff; Peter Andersen | 2002 |
| HQDWQAQW<br>NQAMEALA<br>RAYR              | 8591       | 31            | 50          | 54040982                   | esxQ                         | M. tb H37Rv             | Homo sapiens  | Occurrence of infectious disease | Mycobacterium tuberculosis H37Rv       | Source Organism                      |                       | ESAT-6-like protein esxQ                         |               |                 | ELISPOT    | Cytokine Release-IFN-g | 12228269  | Rikke Louise Vinther SkjØt; Inger Brock; Sandra M Arend; Martin E Munk; Michael Theisen; Tom H M Ottenhoff; Peter Andersen | 2002 |
| MSQSMYSYP<br>AMTANVGD<br>MAG              | 24571      | 51            | 70          | 54040982                   | esxQ                         | M. tb H37Rv             | Homo sapiens  | Occurrence of infectious disease | Mycobacterium tuberculosis H37Rv       | Source Organism                      |                       | ESAT-6-like protein esxQ                         |               |                 | ELISPOT    | Cytokine Release-IFN-g | 12228269  | Rikke Louise Vinther SkjØt; Inger Brock; Sandra M Arend; Martin E Munk; Michael Theisen; Tom H M Ottenhoff; Peter Andersen | 2002 |
| MTANVGDM<br>AGYTGTTQS<br>LGA              | 42642      | 1             | 20          | 54040982                   | esxQ                         | M. tb H37Rv             | Homo sapiens  | Occurrence of infectious disease | Mycobacterium tuberculosis H37Rv       | Source Organism                      |                       | ESAT-6-like protein esxQ                         |               |                 | ELISPOT    | Cytokine Release-IFN-g | 12228269  | Rikke Louise Vinther SkjØt; Inger Brock; Sandra M Arend; Martin E Munk; Michael Theisen; Tom H M Ottenhoff; Peter Andersen | 2002 |
| RACQGDLG<br>MSHQDWQA<br>QWNQ              | 42739      | 11            | 30          | 54040982                   | esxQ                         | M. tb H37Rv             | Homo sapiens  | Occurrence of infectious disease | Mycobacterium tuberculosis H37Rv       | Source Organism                      |                       | ESAT-6-like protein esxQ                         |               |                 | ELISPOT    | Cytokine Release-IFN-g | 12228269  | Rikke Louise Vinther SkjØt; Inger Brock; Sandra M Arend; Martin E Munk; Michael Theisen; Tom H M Ottenhoff; Peter Andersen | 2002 |
| RCRRALRQI<br>GVLERPVG<br>DSS              | 53075      | 41            | 60          | 54040982                   | esxQ                         | M. tb H37Rv             | Homo sapiens  | Occurrence of infectious disease | Mycobacterium tuberculosis H37Rv       | Source Organism                      |                       | ESAT-6-like protein esxQ                         |               |                 | ELISPOT    | Cytokine Release-IFN-g | 12228269  | Rikke Louise Vinther SkjØt; Inger Brock; Sandra M Arend; Martin E Munk; Michael Theisen; Tom H M Ottenhoff; Peter Andersen | 2002 |
| RGRWLDPRH<br>AGPATAADA<br>GD              | 53312      | 71            | 90          | 54040982                   | esxQ                         | M. tb H37Rv             | Homo sapiens  | Occurrence of infectious disease | Mycobacterium tuberculosis H37Rv       | Source Organism                      |                       | ESAT-6-like protein esxQ                         |               |                 | ELISPOT    | Cytokine Release-IFN-g | 12228269  | Rikke Louise Vinther SkjØt; Inger Brock; Sandra M Arend; Martin E Munk; Michael Theisen; Tom H M Ottenhoff; Peter Andersen | 2002 |
| VLERPVGDS<br>SDCGTIRVGS<br>F              | 53974      | 101           | 120         | 54040982                   | esxQ                         | M. tb H37Rv             | Homo sapiens  | Occurrence of infectious disease | Mycobacterium tuberculosis H37Rv       | Source Organism                      |                       | ESAT-6-like protein esxQ                         |               |                 | ELISPOT    | Cytokine Release-IFN-g | 12228269  | Rikke Louise Vinther SkjØt; Inger Brock; Sandra M Arend; Martin E Munk; Michael Theisen; Tom H M Ottenhoff; Peter Andersen | 2002 |
| YTGTTQSLG<br>ADIASERTAP<br>S              | 69467      | 81            | 100         | 54040982                   | esxQ                         | M. tb H37Rv             | Homo sapiens  | Occurrence of infectious disease | Mycobacterium tuberculosis H37Rv       | Source Organism                      |                       | ESAT-6-like protein esxQ                         |               |                 | ELISPOT    | Cytokine Release-IFN-g | 12228269  | Rikke Louise Vinther SkjØt; Inger Brock; Sandra M Arend; Martin E Munk; Michael Theisen; Tom H M Ottenhoff; Peter Andersen | 2002 |
| ALEDLVRAY<br>QMSGTHES<br>NT               | 76066      | 21            | 40          | 54040982                   | esxQ                         | M. tb H37Rv             | Homo sapiens  | Occurrence of infectious disease | Mycobacterium tuberculosis H37Rv       | Source Organism                      |                       | ESAT-6-like protein esxQ                         |               |                 | ELISPOT    | Cytokine Release-IFN-g | 12228269  | Rikke Louise Vinther SkjØt; Inger Brock; Sandra M Arend; Martin E Munk; Michael Theisen; Tom H M Ottenhoff; Peter Andersen | 2002 |
| MMAHAGDM<br>AGYAGTLQS<br>LGA              | 2497       | 61            | 80          | 54040983                   | esxR                         | M. tb H37Rv             | Homo sapiens  | Occurrence of infectious disease | Mycobacterium tuberculosis H37Rv       | Source Organism                      |                       | ESAT-6-like protein esxR                         |               |                 | ELISPOT    | Cytokine Release-IFN-g | 12228269  | Rikke Louise Vinther SkjØt; Inger Brock; Sandra M Arend; Martin E Munk; Michael Theisen; Tom H M Ottenhoff; Peter Andersen | 2002 |
| SAWQGDGTG<br>TYQGWQTQ<br>WNQ              | 42102      | 11            | 30          | 54040983                   | esxR                         | M. tb H37Rv             | Homo sapiens  | Occurrence of infectious disease | Mycobacterium tuberculosis H37Rv       | Source Organism                      |                       | ESAT-6-like protein esxR                         |               |                 | ELISPOT    | Cytokine Release-IFN-g | 12228269  | Rikke Louise Vinther SkjØt; Inger Brock; Sandra M Arend; Martin E Munk; Michael Theisen; Tom H M Ottenhoff; Peter Andersen | 2002 |
| SMSGTHESN<br>TMAMLARD<br>GAE              | 57048      | 41            | 60          | 54040983                   | esxR                         | M. tb H37Rv             | Homo sapiens  | Occurrence of infectious disease | Mycobacterium tuberculosis H37Rv       | Source Organism                      |                       | ESAT-6-like protein esxR                         |               |                 | ELISPOT    | Cytokine Release-IFN-g | 12228269  | Rikke Louise Vinther SkjØt; Inger Brock; Sandra M Arend; Martin E Munk; Michael Theisen; Tom H M Ottenhoff; Peter Andersen | 2002 |
| YQGWQTQW<br>NQALEDLVR<br>AYQ              | 59748      | 71            | 90          | 54040983                   | esxR                         | M. tb H37Rv             | Homo sapiens  | Occurrence of infectious disease | Mycobacterium tuberculosis H37Rv       | Source Organism                      |                       | ESAT-6-like protein esxR                         |               |                 | ELISPOT    | Cytokine Release-IFN-g | 12228269  | Rikke Louise Vinther SkjØt; Inger Brock; Sandra M Arend; Martin E Munk; Michael Theisen; Tom H M Ottenhoff; Peter Andersen | 2002 |
|                                           | 75496      | 51            | 70          | 54040983                   | esxR                         | M. tb H37Rv             | Homo sapiens  | Occurrence of infectious disease | Mycobacterium tuberculosis H37Rv       | Source Organism                      |                       | ESAT-6-like protein esxR                         |               |                 | ELISPOT    | Cytokine Release-IFN-g | 12228269  | Rikke Louise Vinther SkjØt; Inger Brock; Sandra M Arend; Martin E Munk; Michael Theisen; Tom H M Ottenhoff; Peter Andersen | 2002 |















| Gene       | esxO    | esxO    | esxO    | esxO    | esxV    | esxV    | esxV    | esxD    | esxD    | esxF    | esxQ    | esxJ    | esxJ    |
|------------|---------|---------|---------|---------|---------|---------|---------|---------|---------|---------|---------|---------|---------|
| Position   | 2626095 | 2626113 | 2626149 | 2626155 | 4060100 | 4060107 | 4060230 | 4374247 | 4374339 | 4390753 | 3376685 | 1160894 | 1161026 |
| Original   | GCG     | CAG     | GGU     | CAG     | CUG     | AUU     | CAC     | AAC     | CUG     | UCG     | GCC     | GAA     | GGC     |
| New        | GCC     | CAA     | GGG     | CAA     | UUG     | AUC     | CAU     | AAU     | UUG     | UCC     | GCU     | GAG     | GGU     |
| H37RV (WT) | G       | G       | T       | G       | G       | A       | G       | G       | G       | C       | G       | A       | C       |
| mut        | C       | A       | G       | A       | A       | G       | A       | A       | A       | G       | A       | G       | T       |
| SNP        | 26      | 20      | 8       | 6       | 57      | 54      | 13      | 42      | 12      | 93      | 56      | 86      | 42      |
| 1          | -       | -       | -       | -       | SNP     | -       | -       | -       | -       | -       | -       | -       | -       |
| 69         | -       | -       | -       | -       | SNP     | -       | -       | -       | -       | -       | -       | -       | -       |
| 27         | -       | -       | -       | -       | SNP     | -       | -       | -       | -       | -       | -       | -       | -       |
| 59         | -       | -       | -       | -       | SNP     | -       | -       | -       | -       | -       | -       | -       | -       |
| 66         | -       | -       | -       | -       | SNP     | -       | -       | -       | -       | -       | -       | -       | -       |
| 115        | -       | -       | -       | -       | SNP     | -       | -       | -       | -       | -       | -       | -       | -       |
| 7          | -       | -       | SNP     | -       | SNP     | -       | -       | -       | -       | -       | -       | -       | -       |
| 80         | -       | -       | SNP     | -       | SNP     | -       | -       | -       | -       | -       | -       | -       | -       |
| 81         | -       | -       | SNP     | -       | SNP     | -       | -       | -       | -       | -       | -       | -       | -       |
| 82         | -       | -       | SNP     | -       | SNP     | -       | -       | -       | -       | -       | -       | -       | -       |
| 83         | -       | -       | SNP     | -       | SNP     | -       | -       | -       | -       | -       | -       | -       | -       |
| 94         | -       | -       | -       | -       | SNP     | -       | -       | -       | -       | -       | -       | -       | -       |
| 16         | -       | -       | -       | -       | SNP     | -       | -       | -       | -       | -       | -       | -       | -       |
| 4          | -       | -       | -       | -       | SNP     | -       | -       | -       | -       | SNP     | -       | -       | -       |
| 57         | -       | -       | -       | -       | -       | -       | SNP     | -       | -       | -       | -       | -       | -       |
| 88         | -       | -       | -       | -       | SNP     | -       | -       | -       | -       | -       | -       | -       | -       |
| 56         | -       | -       | -       | -       | -       | -       | SNP     | -       | -       | -       | -       | -       | -       |
| 85         | -       | -       | -       | -       | -       | -       | SNP     | -       | -       | -       | -       | -       | -       |
| 30         | -       | -       | -       | -       | -       | -       | SNP     | -       | -       | -       | -       | -       | -       |
| 32         | -       | -       | -       | -       | SNP     | -       | -       | -       | -       | -       | -       | -       | -       |
| 38         | -       | -       | -       | -       | SNP     | -       | -       | -       | -       | -       | -       | -       | -       |
| 44         | SNP     | -       | SNP     | SNP     | SNP     | -       | -       | -       | -       | -       | -       | -       | -       |
| 46         | -       | -       | -       | -       | SNP     | -       | -       | -       | -       | -       | -       | -       | -       |
| 90         | -       | -       | -       | -       | SNP     | -       | -       | -       | -       | -       | -       | -       | -       |
| 9          | -       | -       | -       | -       | -       | -       | SNP     | -       | -       | -       | -       | -       | -       |
| 13         | -       | -       | -       | -       | SNP     | -       | -       | -       | -       | -       | -       | -       | -       |
| 14         | -       | -       | -       | -       | -       | -       | SNP     | -       | -       | -       | -       | -       | -       |
| 21         | -       | -       | -       | -       | -       | -       | SNP     | -       | -       | -       | -       | -       | -       |
| 28         | -       | -       | -       | -       | -       | -       | SNP     | -       | -       | -       | -       | -       | -       |
| 34         | -       | -       | -       | -       | SNP     | -       | -       | -       | -       | -       | -       | -       | -       |
| 35         | -       | -       | -       | -       | SNP     | -       | -       | -       | -       | -       | -       | -       | -       |
| 39         | -       | -       | -       | -       | -       | -       | SNP     | -       | -       | -       | -       | -       | -       |
| 40         | -       | -       | -       | -       | -       | -       | SNP     | -       | -       | -       | -       | -       | -       |
| 45         | -       | -       | -       | -       | SNP     | -       | -       | -       | -       | -       | -       | -       | -       |
| 47         | -       | -       | -       | -       | SNP     | -       | -       | -       | -       | -       | -       | -       | -       |
| 48         | -       | -       | -       | -       | -       | -       | SNP     | -       | -       | -       | -       | -       | -       |
| 51         | -       | -       | -       | -       | SNP     | -       | -       | -       | -       | -       | -       | -       | -       |
| 53         | -       | -       | -       | -       | SNP     | -       | -       | -       | -       | -       | -       | -       | -       |
| 63         | -       | -       | -       | -       | SNP     | -       | -       | -       | -       | -       | -       | -       | -       |
| 74         | -       | -       | -       | -       | SNP     | -       | -       | -       | -       | -       | -       | -       | -       |
| 101        | -       | -       | -       | -       | SNP     | -       | -       | -       | -       | -       | -       | -       | -       |
| 106        | -       | -       | -       | -       | SNP     | -       | -       | -       | -       | -       | -       | -       | -       |
| 6          | -       | -       | SNP     | -       | -       | -       | SNP     | -       | -       | -       | -       | -       | -       |
| 15         | -       | -       | -       | -       | SNP     | -       | -       | -       | -       | -       | -       | -       | -       |
| 18         | -       | -       | -       | -       | SNP     | -       | -       | -       | -       | -       | -       | -       | -       |
| 52         | -       | -       | -       | -       | -       | -       | SNP     | -       | -       | -       | -       | -       | -       |
| 54         | -       | -       | -       | -       | SNP     | -       | -       | -       | -       | -       | -       | -       | -       |
| 3          | -       | -       | -       | -       | SNP     | -       | -       | -       | -       | -       | -       | -       | -       |
| 8          | -       | -       | -       | -       | SNP     | -       | -       | -       | -       | -       | -       | -       | -       |
| 10         | -       | -       | -       | -       | SNP     | -       | -       | -       | -       | -       | -       | -       | -       |
| 12         | -       | -       | -       | -       | SNP     | -       | -       | -       | -       | -       | -       | -       | -       |
| 17         | -       | -       | -       | -       | SNP     | -       | -       | -       | -       | SNP     | -       | -       | -       |
| 20         | -       | -       | -       | -       | SNP     | -       | -       | -       | -       | -       | -       | -       | -       |
| 36         | -       | -       | -       | -       | SNP     | -       | -       | -       | -       | -       | -       | -       | -       |
| 43         | -       | -       | -       | -       | -       | -       | SNP     | -       | -       | -       | -       | -       | -       |
| 49         | -       | -       | -       | -       | SNP     | -       | -       | -       | -       | -       | -       | -       | -       |
| 58         | -       | -       | -       | -       | SNP     | -       | -       | -       | -       | -       | -       | -       | -       |
| 60         | -       | -       | -       | -       | SNP     | -       | -       | -       | -       | -       | -       | -       | -       |
| 67         | -       | -       | -       | -       | -       | -       | SNP     | -       | -       | -       | -       | -       | -       |
| 68         | -       | -       | -       | -       | -       | -       | SNP     | -       | -       | -       | -       | -       | -       |
| 100        | -       | -       | -       | -       | SNP     | -       | -       | -       | -       | -       | -       | -       | -       |
| 33         | -       | -       | -       | -       | SNP     | -       | -       | -       | -       | -       | -       | -       | -       |
| 42         | -       | -       | -       | -       | -       | -       | SNP     | -       | -       | -       | -       | -       | -       |
| 22         | -       | -       | -       | -       | -       | -       | SNP     | -       | -       | -       | -       | -       | -       |
| 2          | -       | -       | -       | -       | SNP     | -       | -       | -       | -       | -       | -       | -       | -       |
| 11         | -       | -       | -       | -       | SNP     | -       | -       | -       | -       | -       | -       | -       | -       |
| 19         | -       | -       | -       | -       | SNP     | -       | -       | -       | -       | -       | -       | -       | -       |
| 24         | -       | -       | -       | -       | -       | -       | SNP     | -       | -       | -       | -       | -       | -       |
| 25         | -       | -       | -       | -       | -       | -       | SNP     | -       | -       | -       | -       | -       | -       |
| 26         | -       | -       | -       | -       | -       | -       | SNP     | -       | -       | -       | -       | -       | -       |
| 29         | -       | -       | -       | -       | -       | -       | SNP     | -       | -       | -       | -       | -       | -       |
| 31         | -       | -       | -       | -       | SNP     | -       | -       | -       | -       | SNP     | -       | -       | -       |
| 37         | -       | -       | -       | -       | SNP     | -       | -       | -       | -       | SNP     | -       | -       | -       |
| 55         | -       | -       | -       | -       | -       | SNP     | SNP     | SNP     | -       | -       | -       | -       | -       |
| 62         | -       | -       | -       | -       | -       | SNP     | SNP     | -       | -       | -       | -       | -       | -       |
| 64         | -       | -       | -       | -       | SNP     | -       | -       | -       | -       | -       | -       | SNP     | -       |
| 70         | -       | SNP     | SNP     | -       | SNP     | -       | -       | -       | -       | -       | -       | -       | -       |
| 73         | -       | -       | -       | -       | -       | -       | SNP     | -       | -       | -       | -       | -       | -       |
| 78         | -       | -       | -       | -       | SNP     | -       | -       | -       | SNP     | -       | -       | -       | -       |
| 84         | -       | -       | -       | -       | SNP     | -       | -       | -       | -       | -       | -       | -       | -       |
| 86         | -       | -       | -       | -       | SNP     | -       | -       | -       | -       | -       | -       | -       | -       |
| 87         | -       | -       | -       | -       | -       | -       | -       | SNP     | -       | -       | -       | -       | SNP     |
| 89         | SNP     | -       | -       | SNP     | -       | -       | SNP     | -       | -       | -       | -       | -       | -       |
| 91         | SNP     | -       | -       | -       | SNP     | -       | -       | -       | -       | -       | -       | -       | -       |
| 95         | -       | -       | -       | -       | SNP     | -       | -       | -       | -       | -       | -       | -       | -       |
| 98         | -       | -       | -       | -       | -       | -       | SNP     | -       | -       | -       | -       | -       | -       |
| 99         | -       | -       | -       | -       | SNP     | -       | -       | -       | -       | -       | -       | -       | -       |
| 104        | -       | -       | -       | -       | SNP     | -       | -       | -       | -       | -       | -       | -       | -       |
| 105        | -       | -       | -       | -       | SNP     | -       | -       | -       | -       | -       | -       | -       | -       |
| 107        | -       | -       | -       | -       | SNP     | -       | -       | -       | -       | -       | -       | -       | -       |
| 108        | -       | -       | -       | -       | SNP     | -       | -       | -       | -       | -       | -       | -       | -       |
| 109        | -       | -       | -       | -       | SNP     | -       | -       | -       | -       | -       | -       | -       | -       |
| 110        | -       | -       | -       | -       | SNP     | -       | -       | -       | -       | -       | -       | -       | -       |
| 111        | -       | -       | -       | -       | SNP     | -       | -       | -       | -       | -       | -       | -       | -       |
| 112        | -       | -       | -       | -       | SNP     | -       | -       | -       | -       | -       | -       | -       | -       |
| 113        | -       | -       | -       | -       | SNP     | -       | -       | -       | -       | -       | -       | -       | -       |
| 114        | -       | -       | -       | -       | SNP     | -       | -       | -       | -       | -       | -       | -       | -       |
| 116        | -       | -       | -       | -       | -       | -       | SNP     | -       | -       | -       | -       | -       | -       |
| 117        | -       | -       | -       | -       | SNP     | -       | -       | -       | -       | -       | -       | -       | -       |
| 118        | -       | -       | -       | -       | SNP     | -       | -       | -       | -       | -       | -       | -       | -       |
| 119        | -       | -       | -       | -       | SNP     | -       | -       | -       | -       | -       | -       | -       | -       |
| 65         | -       | -       | -       | -       | -       | -       | -       | SNP     | -       | -       | -       | -       | -       |
| 97         | -       | -       | -       | -       | -       | -       | -       | -       | -       | -       | SNP     | -       | -       |
| 41         | -       | -       | -       | -       | SNP     | -       | -       | -       | -       | -       | -       | -       | -       |
| 61         | -       | -       | SNP     | -       | -       | -       | -       | SNP     | -       | -       | -       | -       | -       |
| 50         | -       | -       | -       | -       | -       | -       | -       | SNP     | -       | -       | -       | -       | -       |
| 93         | -       | -       | -       | -       | -       | -       | -       | SNP     | -       | -       | -       | -       | -       |
| 23         | -       | -       | -       | -       | SNP     | -       | -       | -       | -       | -       | SNP     | -       | -       |



| Gene       | esxP    | esxP    | esxP    | esxP    | esxW    | esxW    | esxW    | esxW    |
|------------|---------|---------|---------|---------|---------|---------|---------|---------|
| Position   | 2626400 | 2626403 | 2626490 | 2626514 | 4060334 | 4060340 | 4060466 | 4060583 |
| Original   | AUC     | AAC     | CAC     | GCA     | GAA     | AAC     | GGC     | UCG     |
| New        | AUU     | AAU     | CAU     | GCC     | GAG     | AAU     | GGU     | UCA     |
| H37RV (WT) | C       | C       | C       | A       | T       | G       | G       | C       |
| mut        | T       | T       | T       | C       | C       | A       | A       | T       |
| SNP        | 40      | 39      | 10      | 2       | 86      | 84      | 42      | 3       |
| 1          | -       | -       | -       | SNP     | -       | -       | -       | -       |
| 69         | -       | -       | -       | SNP     | -       | -       | -       | -       |
| 27         | -       | -       | -       | SNP     | -       | -       | -       | -       |
| 59         | -       | -       | -       | SNP     | -       | -       | -       | -       |
| 66         | -       | -       | -       | SNP     | -       | -       | -       | -       |
| 115        | -       | -       | -       | SNP     | -       | -       | -       | -       |
| 7          | -       | -       | -       | SNP     | -       | -       | -       | -       |
| 80         | -       | -       | -       | SNP     | -       | -       | -       | -       |
| 81         | -       | -       | -       | SNP     | -       | -       | -       | -       |
| 82         | -       | -       | -       | SNP     | -       | -       | -       | -       |
| 83         | -       | -       | -       | SNP     | -       | -       | -       | -       |
| 94         | -       | -       | -       | -       | -       | -       | -       | -       |
| 16         | -       | -       | -       | -       | -       | -       | -       | -       |
| 4          | -       | -       | -       | -       | SNP     | -       | -       | -       |
| 57         | -       | -       | -       | -       | -       | -       | -       | -       |
| 88         | -       | -       | -       | -       | -       | -       | SNP     | -       |
| 56         | -       | -       | -       | -       | -       | -       | -       | -       |
| 85         | -       | -       | -       | -       | -       | -       | -       | -       |
| 30         | -       | -       | -       | -       | -       | -       | -       | -       |
| 32         | -       | -       | -       | -       | -       | -       | -       | -       |
| 38         | -       | -       | -       | -       | -       | -       | -       | -       |
| 44         | SNP     | SNP     | -       | SNP     | -       | -       | -       | -       |
| 46         | -       | -       | -       | -       | -       | -       | -       | -       |
| 90         | -       | -       | -       | -       | -       | -       | -       | -       |
| 9          | -       | -       | -       | -       | -       | -       | -       | -       |
| 13         | -       | -       | -       | -       | -       | -       | -       | -       |
| 14         | -       | -       | -       | -       | -       | -       | -       | -       |
| 21         | -       | -       | -       | -       | -       | -       | -       | -       |
| 28         | -       | -       | -       | -       | -       | -       | -       | -       |
| 34         | -       | -       | -       | -       | -       | -       | -       | -       |
| 35         | -       | -       | -       | -       | -       | -       | -       | -       |
| 39         | -       | -       | -       | -       | -       | -       | -       | -       |
| 40         | -       | -       | -       | -       | -       | -       | -       | -       |
| 45         | -       | -       | -       | -       | -       | -       | -       | -       |
| 47         | -       | -       | -       | -       | -       | -       | -       | -       |
| 48         | -       | -       | -       | -       | -       | -       | -       | -       |
| 51         | -       | -       | -       | -       | -       | -       | -       | -       |
| 53         | -       | -       | -       | -       | -       | -       | -       | -       |
| 63         | -       | -       | -       | -       | -       | -       | -       | -       |
| 74         | -       | -       | -       | SNP     | -       | -       | -       | -       |
| 101        | -       | -       | -       | -       | -       | -       | -       | -       |
| 106        | -       | -       | -       | -       | -       | -       | -       | -       |
| 6          | -       | -       | -       | SNP     | -       | -       | -       | -       |
| 15         | -       | -       | -       | -       | -       | -       | -       | -       |
| 18         | -       | -       | -       | -       | -       | -       | -       | -       |
| 52         | -       | -       | -       | -       | -       | -       | -       | -       |
| 54         | -       | -       | -       | -       | SNP     | -       | -       | -       |
| 3          | -       | -       | -       | -       | -       | -       | -       | -       |
| 8          | -       | -       | -       | -       | SNP     | -       | -       | -       |
| 10         | -       | -       | -       | -       | -       | -       | -       | -       |
| 12         | -       | -       | -       | -       | SNP     | -       | -       | -       |
| 17         | -       | -       | -       | -       | SNP     | -       | -       | -       |
| 20         | -       | -       | -       | -       | SNP     | -       | -       | -       |
| 36         | -       | -       | -       | -       | -       | -       | SNP     | -       |
| 43         | -       | -       | -       | -       | -       | -       | -       | -       |
| 49         | -       | -       | -       | -       | SNP     | -       | -       | -       |
| 58         | -       | -       | SNP     | -       | -       | -       | -       | -       |
| 60         | -       | -       | -       | -       | -       | -       | -       | -       |
| 67         | -       | -       | -       | -       | -       | -       | -       | -       |
| 68         | -       | -       | -       | -       | -       | -       | -       | -       |
| 100        | -       | -       | -       | SNP     | SNP     | -       | -       | -       |
| 33         | -       | -       | -       | -       | -       | -       | -       | -       |
| 42         | -       | -       | -       | -       | -       | -       | -       | -       |
| 22         | -       | -       | -       | -       | -       | -       | -       | -       |
| 2          | -       | -       | -       | -       | SNP     | -       | -       | -       |
| 11         | -       | -       | -       | -       | -       | -       | -       | -       |
| 19         | -       | -       | -       | -       | -       | -       | -       | -       |
| 24         | -       | -       | -       | -       | -       | -       | -       | -       |
| 25         | -       | -       | -       | -       | -       | -       | -       | -       |
| 26         | -       | -       | -       | -       | SNP     | -       | -       | -       |
| 29         | -       | -       | -       | -       | -       | -       | -       | -       |
| 31         | -       | -       | -       | -       | SNP     | -       | -       | -       |
| 37         | -       | -       | -       | -       | SNP     | -       | -       | -       |
| 55         | -       | -       | -       | -       | SNP     | -       | -       | -       |
| 62         | -       | -       | -       | -       | SNP     | -       | -       | -       |
| 64         | -       | -       | -       | -       | SNP     | -       | -       | -       |
| 70         | -       | -       | -       | -       | SNP     | -       | SNP     | SNP     |
| 73         | -       | -       | -       | -       | -       | -       | -       | -       |
| 78         | -       | -       | -       | -       | SNP     | -       | -       | -       |
| 84         | -       | -       | -       | -       | -       | -       | -       | -       |
| 86         | -       | -       | -       | -       | -       | -       | -       | -       |
| 87         | -       | -       | -       | SNP     | -       | -       | -       | -       |
| 89         | -       | -       | -       | -       | -       | -       | -       | -       |
| 91         | -       | -       | -       | SNP     | -       | -       | -       | -       |
| 95         | -       | -       | -       | -       | -       | -       | -       | -       |
| 98         | -       | -       | -       | -       | -       | -       | -       | -       |
| 99         | -       | -       | -       | -       | -       | -       | -       | -       |
| 104        | -       | -       | -       | -       | SNP     | -       | -       | -       |
| 105        | -       | -       | -       | -       | -       | -       | SNP     | -       |
| 107        | -       | -       | -       | -       | -       | -       | -       | -       |
| 108        | -       | -       | -       | -       | -       | -       | -       | -       |
| 109        | -       | -       | -       | -       | -       | -       | -       | -       |
| 110        | -       | -       | -       | -       | SNP     | -       | -       | -       |
| 111        | -       | -       | -       | -       | -       | -       | -       | -       |
| 112        | -       | -       | -       | -       | SNP     | -       | -       | -       |
| 113        | -       | -       | -       | -       | SNP     | -       | -       | -       |
| 114        | -       | -       | -       | -       | SNP     | SNP     | -       | -       |
| 116        | -       | -       | -       | -       | -       | -       | -       | -       |
| 117        | -       | -       | -       | -       | -       | -       | -       | -       |
| 118        | -       | -       | -       | -       | -       | -       | -       | -       |
| 119        | -       | -       | -       | -       | -       | -       | -       | -       |
| 65         | -       | -       | -       | -       | -       | -       | -       | -       |
| 97         | -       | -       | SNP     | -       | -       | -       | -       | -       |
| 41         | -       | -       | SNP     | SNP     | -       | -       | -       | -       |
| 61         | -       | -       | -       | -       | -       | -       | -       | -       |
| 50         | -       | -       | -       | -       | -       | -       | -       | -       |
| 93         | -       | -       | -       | -       | -       | -       | -       | -       |
| 23         | -       | -       | SNP     | -       | -       | -       | -       | -       |

NJ-Tree, MIRU-VNTR [24]: Categorical (1), Spoligo: Categorical (1)

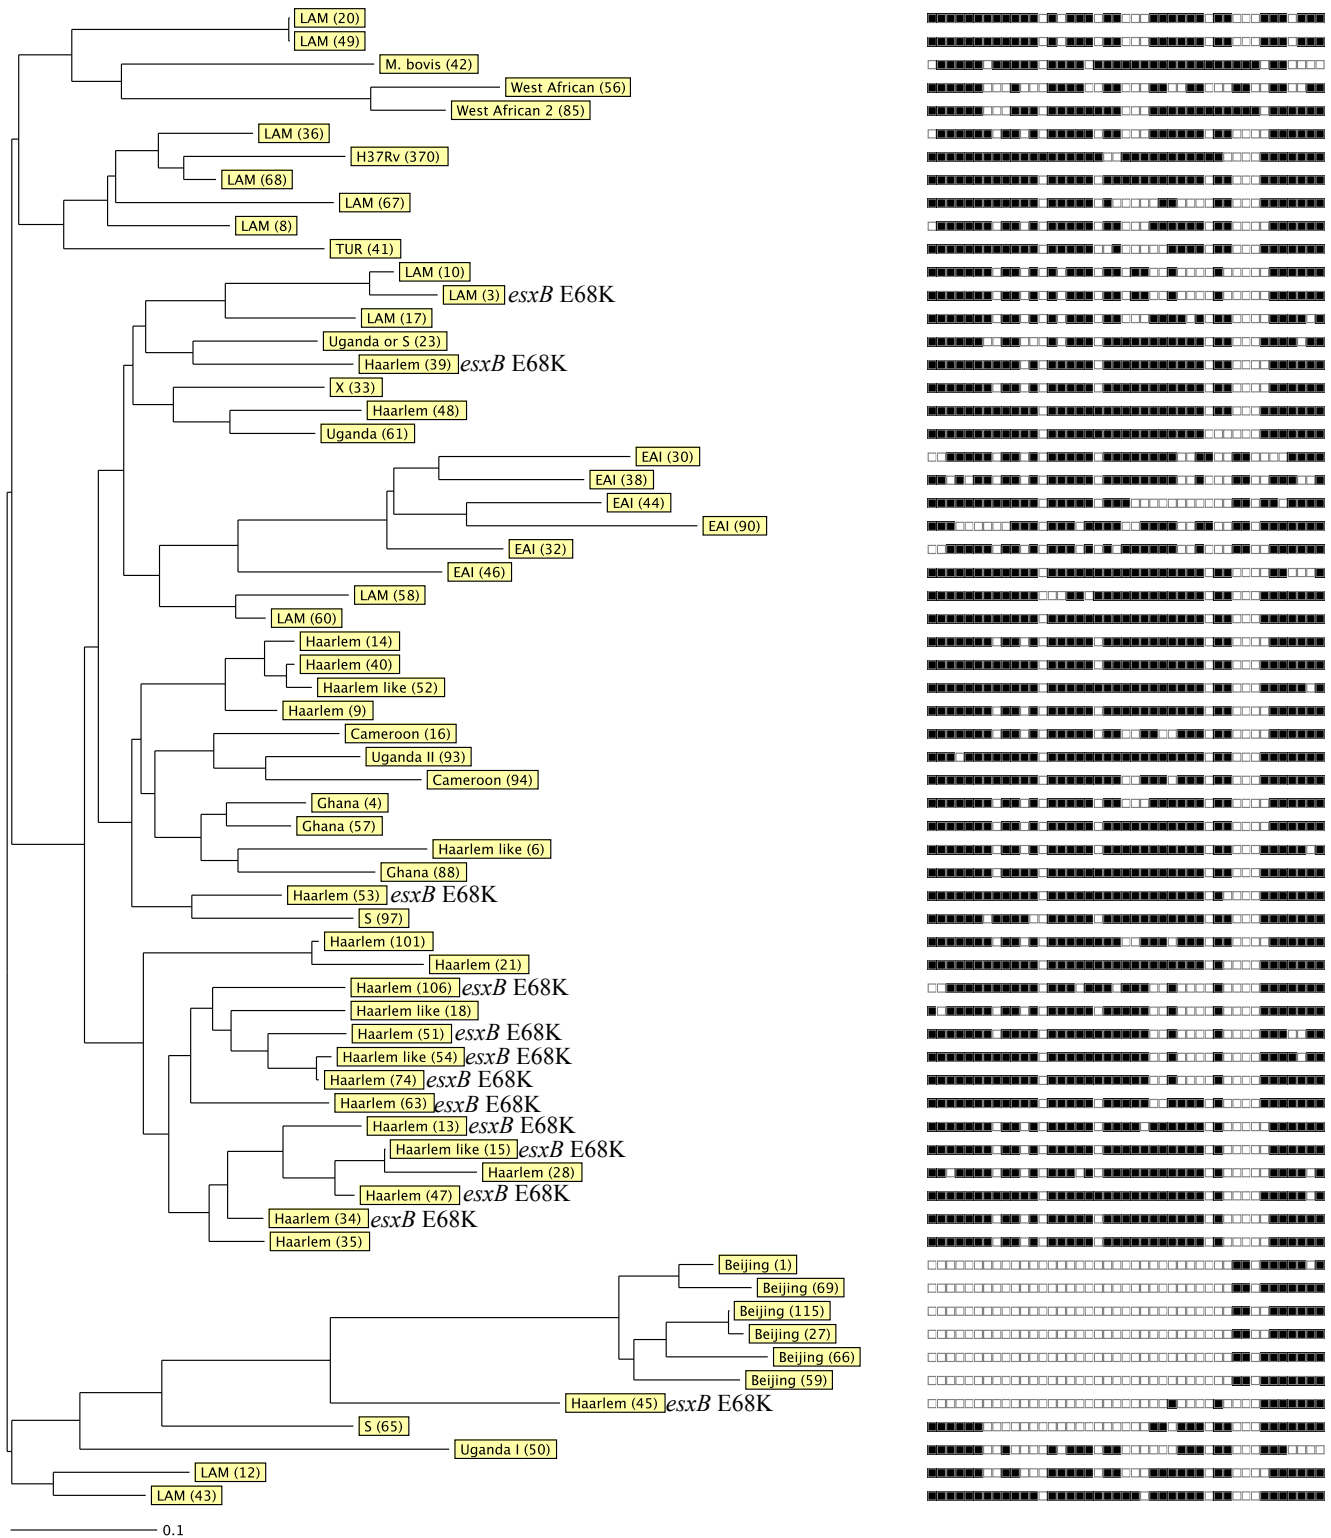

FIG S1. Neighbor-joining tree of 65 clinical isolates using available MIRU-VNTR and spoligotyping data. Note the coherency of the presence of the *esxB* E68K allele and the clades derived via genotyping.
